# Supplementary material for: Infection and biogeographical characteristics of Paragonimus westermani and P. skrjabini in humans and animal hosts in China: A systematic review and meta-analysis
Source: PubMed Central journal article supplement (PMC11326572; doi:10.1371/journal.pntd.0012366), 2024-08-05

Infection and biogeographical characteristics of *Paragonimus westermani* and *P. skrjabini* in humans and animal hosts in China: a systematic review and meta-analysis  
 --Manuscript Draft--

|                                                                                         |                                                                                                                                                                                                                                                                                                                                                                                                                                                                                                                                                                                                                                                                                                                                                                                                                                                                                                                                                                                                                                                                                                                                                                                                                                                                                                                                                                                                                                                                                                                                                                                                                                                                                                                                                                                                                                                                                                                                                                                                                                                                                                                                                                                                                                                                                                                                                                                                                                                                                                                                                                |
|-----------------------------------------------------------------------------------------|----------------------------------------------------------------------------------------------------------------------------------------------------------------------------------------------------------------------------------------------------------------------------------------------------------------------------------------------------------------------------------------------------------------------------------------------------------------------------------------------------------------------------------------------------------------------------------------------------------------------------------------------------------------------------------------------------------------------------------------------------------------------------------------------------------------------------------------------------------------------------------------------------------------------------------------------------------------------------------------------------------------------------------------------------------------------------------------------------------------------------------------------------------------------------------------------------------------------------------------------------------------------------------------------------------------------------------------------------------------------------------------------------------------------------------------------------------------------------------------------------------------------------------------------------------------------------------------------------------------------------------------------------------------------------------------------------------------------------------------------------------------------------------------------------------------------------------------------------------------------------------------------------------------------------------------------------------------------------------------------------------------------------------------------------------------------------------------------------------------------------------------------------------------------------------------------------------------------------------------------------------------------------------------------------------------------------------------------------------------------------------------------------------------------------------------------------------------------------------------------------------------------------------------------------------------|
| <b>Manuscript Number:</b>                                                               | PNTD-D-24-00165                                                                                                                                                                                                                                                                                                                                                                                                                                                                                                                                                                                                                                                                                                                                                                                                                                                                                                                                                                                                                                                                                                                                                                                                                                                                                                                                                                                                                                                                                                                                                                                                                                                                                                                                                                                                                                                                                                                                                                                                                                                                                                                                                                                                                                                                                                                                                                                                                                                                                                                                                |
| <b>Full Title:</b>                                                                      | Infection and biogeographical characteristics of <i>Paragonimus westermani</i> and <i>P. skrjabini</i> in humans and animal hosts in China: a systematic review and meta-analysis                                                                                                                                                                                                                                                                                                                                                                                                                                                                                                                                                                                                                                                                                                                                                                                                                                                                                                                                                                                                                                                                                                                                                                                                                                                                                                                                                                                                                                                                                                                                                                                                                                                                                                                                                                                                                                                                                                                                                                                                                                                                                                                                                                                                                                                                                                                                                                              |
| <b>Short Title:</b>                                                                     | Infection and biogeographical characteristics of <i>Paragonimus</i> in China                                                                                                                                                                                                                                                                                                                                                                                                                                                                                                                                                                                                                                                                                                                                                                                                                                                                                                                                                                                                                                                                                                                                                                                                                                                                                                                                                                                                                                                                                                                                                                                                                                                                                                                                                                                                                                                                                                                                                                                                                                                                                                                                                                                                                                                                                                                                                                                                                                                                                   |
| <b>Article Type:</b>                                                                    | Research Article                                                                                                                                                                                                                                                                                                                                                                                                                                                                                                                                                                                                                                                                                                                                                                                                                                                                                                                                                                                                                                                                                                                                                                                                                                                                                                                                                                                                                                                                                                                                                                                                                                                                                                                                                                                                                                                                                                                                                                                                                                                                                                                                                                                                                                                                                                                                                                                                                                                                                                                                               |
| <b>Keywords:</b>                                                                        | Paragonimus; prevalence; meta-analysis; temperature; precipitation; animal hosts; China                                                                                                                                                                                                                                                                                                                                                                                                                                                                                                                                                                                                                                                                                                                                                                                                                                                                                                                                                                                                                                                                                                                                                                                                                                                                                                                                                                                                                                                                                                                                                                                                                                                                                                                                                                                                                                                                                                                                                                                                                                                                                                                                                                                                                                                                                                                                                                                                                                                                        |
| <b>Abstract:</b>                                                                        | <p><b>Abstract</b></p> <p><b>Background</b><br/>                     Paragonimiasis, primarily caused by <i>Paragonimus westermani</i> and <i>P. skrjabini</i> in China, is a common food-borne parasitic zoonosis. Despite numerous epidemiological surveys conducted over the past decades, the national distribution of <i>Paragonimus</i> infection and its associated environmental determinants remain poorly understood. In this paper, we summarize the infection of <i>P. westermani</i> and <i>P. skrjabini</i> and describe key biogeographical characteristics of the endemic areas in China.</p> <p><b>Methods</b><br/>                     Data on <i>Paragonimus</i> infection in humans, snails, second intermediate hosts, and animal reservoirs were extracted from eight electronic databases. A random-effects meta-analysis model was used to estimate the pooled prevalence. All survey locations were georeferenced and plotted on China map, and scatter plots were used to illustrate the biogeographical characteristics of regions reporting <i>Paragonimus</i> infection.</p> <p><b>Results</b><br/>                     A total of 28,948 cases of human paragonimiasis have been documented, with 2,401 cases reported after 2010. Among the 11,443 cases with reported ages, 88.05% were children or adolescents. The pooled prevalence of <i>P. skrjabini</i> is 0.45% (95% CI: 0.27 – 0.66%) in snails, 31.10% (95% CI: 24.77 – 37.80%) in the second intermediate host, and 20.31% (95% CI: 9.69 – 33.38%) in animal reservoirs. For <i>P. westermani</i>, the pooled prevalence is 0.06% (95% CI: 0.01 – 0.13%) in snails, 52.07% (95% CI: 43.56 – 60.52%) in the second intermediate host, and 21.40% (95% CI: 7.82 – 38.99%) in animal reservoirs. <i>P. westermani</i> and <i>P. skrjabini</i> are primarily distributed in regions with low altitude, high temperature, and high precipitation. In northeastern China, only <i>P. westermani</i> infections have been documented, with no presence of <i>P. skrjabini</i>, while in more southern areas, infections of both <i>P. westermani</i> and <i>P. skrjabini</i> have been reported.</p> <p><b>Conclusions</b><br/>                     Paragonimiasis remains prevalent in China, particularly among children and adolescents. Variations exist in the intermediate hosts and geographical distribution of <i>P. westermani</i> and <i>P. skrjabini</i>. Additionally, temperature and precipitation may influence the distribution of <i>Paragonimus</i>.</p> |
| <b>Additional Information:</b>                                                          |                                                                                                                                                                                                                                                                                                                                                                                                                                                                                                                                                                                                                                                                                                                                                                                                                                                                                                                                                                                                                                                                                                                                                                                                                                                                                                                                                                                                                                                                                                                                                                                                                                                                                                                                                                                                                                                                                                                                                                                                                                                                                                                                                                                                                                                                                                                                                                                                                                                                                                                                                                |
| <b>Question</b>                                                                         | <b>Response</b>                                                                                                                                                                                                                                                                                                                                                                                                                                                                                                                                                                                                                                                                                                                                                                                                                                                                                                                                                                                                                                                                                                                                                                                                                                                                                                                                                                                                                                                                                                                                                                                                                                                                                                                                                                                                                                                                                                                                                                                                                                                                                                                                                                                                                                                                                                                                                                                                                                                                                                                                                |
| <b>Government Employee</b>                                                              | No - No authors are employees of the U.S. government.                                                                                                                                                                                                                                                                                                                                                                                                                                                                                                                                                                                                                                                                                                                                                                                                                                                                                                                                                                                                                                                                                                                                                                                                                                                                                                                                                                                                                                                                                                                                                                                                                                                                                                                                                                                                                                                                                                                                                                                                                                                                                                                                                                                                                                                                                                                                                                                                                                                                                                          |
| Are you or any of the contributing authors an employee of the United States government? |                                                                                                                                                                                                                                                                                                                                                                                                                                                                                                                                                                                                                                                                                                                                                                                                                                                                                                                                                                                                                                                                                                                                                                                                                                                                                                                                                                                                                                                                                                                                                                                                                                                                                                                                                                                                                                                                                                                                                                                                                                                                                                                                                                                                                                                                                                                                                                                                                                                                                                                                                                |
| Manuscripts authored by one or more US                                                  |                                                                                                                                                                                                                                                                                                                                                                                                                                                                                                                                                                                                                                                                                                                                                                                                                                                                                                                                                                                                                                                                                                                                                                                                                                                                                                                                                                                                                                                                                                                                                                                                                                                                                                                                                                                                                                                                                                                                                                                                                                                                                                                                                                                                                                                                                                                                                                                                                                                                                                                                                                |

|                                                                                                                                                                                                                                                                                                                                                                                                                                                                                                                                                                                                                                                                                                                                                                                                                                                                                                                                                                                                                                                              |                                                                                                                                                                                                                                                                                                                                                                                                                                                                                                                                                                                                                                                                                                                                                                                                                                                                                                                                                                                |
|--------------------------------------------------------------------------------------------------------------------------------------------------------------------------------------------------------------------------------------------------------------------------------------------------------------------------------------------------------------------------------------------------------------------------------------------------------------------------------------------------------------------------------------------------------------------------------------------------------------------------------------------------------------------------------------------------------------------------------------------------------------------------------------------------------------------------------------------------------------------------------------------------------------------------------------------------------------------------------------------------------------------------------------------------------------|--------------------------------------------------------------------------------------------------------------------------------------------------------------------------------------------------------------------------------------------------------------------------------------------------------------------------------------------------------------------------------------------------------------------------------------------------------------------------------------------------------------------------------------------------------------------------------------------------------------------------------------------------------------------------------------------------------------------------------------------------------------------------------------------------------------------------------------------------------------------------------------------------------------------------------------------------------------------------------|
| <p>Government employees are not copyrighted, but are licensed under a <a href="#">CC0 Public Domain Dedication</a>, which allows unlimited distribution and reuse of the article for any lawful purpose. This is a legal requirement for US Government employees.</p> <p>This will be typeset if the manuscript is accepted for publication.</p>                                                                                                                                                                                                                                                                                                                                                                                                                                                                                                                                                                                                                                                                                                             |                                                                                                                                                                                                                                                                                                                                                                                                                                                                                                                                                                                                                                                                                                                                                                                                                                                                                                                                                                                |
| <p><b>Financial Disclosure</b></p> <p>Enter a financial disclosure statement that describes the sources of funding for the work included in this submission. Review the <a href="#">submission guidelines</a> for detailed requirements. View published research articles from <a href="#">PLOS Neglected Tropical Diseases</a> for specific examples.</p> <p>This statement is required for submission and <b>will appear in the published article</b> if the submission is accepted. Please make sure it is accurate.</p> <p><b>Funded studies</b></p> <p>Enter a statement with the following details:</p> <ul style="list-style-type: none"> <li>• Initials of the authors who received each award</li> <li>• Grant numbers awarded to each author</li> <li>• The full name of each funder</li> <li>• URL of each funder website</li> <li>• Did the sponsors or funders play any role in the study design, data collection and analysis, decision to publish, or preparation of the manuscript?</li> </ul> <p>Did you receive funding for this work?</p> | <p>Yes</p>                                                                                                                                                                                                                                                                                                                                                                                                                                                                                                                                                                                                                                                                                                                                                                                                                                                                                                                                                                     |
| <p>Please add funding details as follow-up to "<b>Financial Disclosure</b></p> <p>Enter a financial disclosure statement that describes the sources of funding for the work included in this submission. Review the <a href="#">submission guidelines</a> for detailed requirements. View published research articles from <a href="#">PLOS Neglected Tropical</a></p>                                                                                                                                                                                                                                                                                                                                                                                                                                                                                                                                                                                                                                                                                       | <p>This research was funded by the Shandong Provincial Natural Science Foundation (<a href="https://cloud.kjt.shandong.gov.cn/">https://cloud.kjt.shandong.gov.cn/</a>) (grant no. ZR2019MH093, ZR2023MH313), the Shandong Provincial Youth Innovation Team Development Plan of Colleges and Universities (<a href="http://edu.shandong.gov.cn/">http://edu.shandong.gov.cn/</a>) (grant no. 2019-6-156, Lu-Jiao), the National Parasite Resource Bank (<a href="https://www.most.gov.cn/index.html">https://www.most.gov.cn/index.html</a>) (grant no. NPRC-2019-194-30), the Quality Education Teaching Resources Project of Shandong Province and Weifang Medical University (<a href="http://edu.shandong.gov.cn/">http://edu.shandong.gov.cn/</a>) (grant no. SDYAL2022152, 22YZSALK01, 23YJSALK01), Joint Research Program of China National Center for Food Safety Risk Assessment (<a href="https://cfsa.net.cn/">https://cfsa.net.cn/</a>) (grant no. LH2022GG08,</p> |

[Diseases](#) for specific examples.

This statement is required for submission and **will appear in the published article** if the submission is accepted. Please make sure it is accurate.

**Funded studies**

Enter a statement with the following details:

- Initials of the authors who received each award
- Grant numbers awarded to each author
- The full name of each funder
- URL of each funder website
- Did the sponsors or funders play any role in the study design, data collection and analysis, decision to publish, or preparation of the manuscript?

Did you receive funding for this work?"

Please select the country of your main research funder (please select carefully as in some cases this is used in fee calculation).

as follow-up to "**Financial Disclosure**

Enter a financial disclosure statement that describes the sources of funding for the work included in this submission. Review the [submission guidelines](#) for detailed requirements. View published research articles from [PLOS Neglected Tropical Diseases](#) for specific examples.

This statement is required for submission and **will appear in the published article** if the submission is accepted. Please make sure it is accurate.

LH2022GG02), and the National Natural Science Foundation of China (<https://www.nsf.gov.cn/>) (grant no. 81902905).

CHINA - CN

**Funded studies**

Enter a statement with the following details:

- Initials of the authors who received each award
- Grant numbers awarded to each author
- The full name of each funder
- URL of each funder website
- Did the sponsors or funders play any role in the study design, data collection and analysis, decision to publish, or preparation of the manuscript?

Did you receive funding for this work?"

**Competing Interests**

On behalf of all authors, disclose any competing interests that could be perceived to bias this work.

This statement will be typeset if the manuscript is accepted for publication.

Review the instructions link below and PLOS NTDs' [competing interests](#) policy to determine what information must be disclosed at submission.

The authors have declared that no competing interests exist.

**Data Availability**

Provide a **Data Availability Statement** in the box below. This statement should detail where the data used in this submission can be accessed. This statement will be typeset if the manuscript is accepted for publication.

Before publication, authors are required to make all data underlying their findings fully available, without restriction. Review our [PLOS Data Policy](#) page for detailed information on this policy. Instructions for writing your Data Availability statement can be accessed via the Instructions link below.

All relevant data are within the manuscript and its Supporting Information files.

1 **Infection and biogeographical characteristics of *Paragonimus westermani* and *P.***  
2 ***skrjabini* in humans and animal hosts in China: a systematic review and meta-**  
3 **analysis**

4 Kai Liu<sup>1#</sup>, Yuan-Chao Sun<sup>1#</sup>, Rui-Tai Pan<sup>1</sup>, Ao-Long Xu<sup>1</sup>, Han Xue<sup>1</sup>, Na Tian<sup>1</sup>, Jin-  
5 Xin Zheng<sup>2</sup>, Fu-Yan Shi<sup>1\*</sup>, Yan Lu<sup>2\*</sup>, Lan-Hua Li<sup>1\*</sup>

6  
7 <sup>1</sup>School of Public Health, Shandong Second Medical University, Weifang, Shandong  
8 261053, PR China.

9 <sup>2</sup>National Institute of Parasitic Diseases, Chinese Center for Disease Control and  
10 Prevention, Shanghai, China; Key Laboratory of Parasite and Vector Biology,  
11 Ministry of Health, WHO Collaborating Center for Malaria, Schistosomiasis and  
12 Filariasis, Shanghai, China

13  
14 \*Corresponding author

15 E-mail: orchid8@sina.com (LH-L); lyyaner@163.com (YL); shifuyan@126.com  
16 (FY-S).

17  
18 #These authors contributed equally to this work, and shared first authorship is  
19 acknowledged between Kai Liu and Yuan-Chao Sun.

20 All authors read and approved the final manuscript.

21

22

23

24

25

## 26 **Abstract**

### 27 **Background**

28 Paragonimiasis, primarily caused by *Paragonimus westermani* and *P. skrjabini* in  
29 China, is a common food-borne parasitic zoonosis. Despite numerous epidemiological  
30 surveys conducted over the past decades, the national distribution of *Paragonimus*  
31 infection and its associated environmental determinants remain poorly understood. In  
32 this paper, we summarize the infection of *P. westermani* and *P. skrjabini* and describe  
33 key biogeographical characteristics of the endemic areas in China.

### 34 **Methods**

35 Data on *Paragonimus* infection in humans, snails, second intermediate hosts, and  
36 animal reservoirs were extracted from eight electronic databases. A random-effects  
37 meta-analysis model was used to estimate the pooled prevalence. All survey  
38 locations were georeferenced and plotted on China map, and scatter plots were used to  
39 illustrate the biogeographical characteristics of regions reporting *Paragonimus*  
40 infection.

### 41 **Results**

42 A total of 28,948 cases of human paragonimiasis have been documented, with 2,401  
43 cases reported after 2010. Among the 11,443 cases with reported ages, 88.05% were  
44 children or adolescents. The pooled prevalence of *P. skrjabini* is 0.45% (95% CI: 0.27  
45 – 0.66%) in snails, 31.10% (95% CI: 24.77 – 37.80%) in the second intermediate host,  
46 and 20.31% (95% CI: 9.69 – 33.38%) in animal reservoirs. For *P. westermani*, the  
47 pooled prevalence is 0.06% (95% CI: 0.01 – 0.13%) in snails, 52.07% (95% CI: 43.56  
48 – 60.52%) in the second intermediate host, and 21.40% (95% CI: 7.82 – 38.99%) in

49 animal reservoirs. *P. westermani* and *P. skrjabini* are primarily distributed in regions  
50 with low altitude, high temperature, and high precipitation. In northeastern China,  
51 only *P. westermani* infections have been documented, with no presence of *P.*  
52 *skrjabini*, while in more southern areas, infections of both *P. westermani* and *P.*  
53 *skrjabini* have been reported.

## 54 **Conclusions**

55 Paragonimiasis remains prevalent in China, particularly among children and  
56 adolescents. Variations exist in the intermediate hosts and geographical distribution of  
57 *P. westermani* and *P. skrjabini*. Additionally, temperature and precipitation may  
58 influence the distribution of *Paragonimus*.

59

## 60 **Author summary**

61 Paragonimiasis, a foodborne zoonotic parasitic disease caused by lung flukes  
62 (*Paragonimus*), remains a significant neglected public health threat in many Asian  
63 countries, including China. Human infection occurs through the ingestion of raw or  
64 undercooked freshwater crab or crayfish containing the metacercariae stage. Given  
65 the popularity of consuming raw or undercooked freshwater products in many areas of  
66 China, understanding the infection status and spatial distribution of *Paragonimus* in  
67 humans and animal hosts is crucial for controlling paragonimiasis. Our study provides  
68 a comprehensive summary of the infection levels of the two most important zoonotic  
69 *Paragonimus* species, *P. westermani* and *P. skrjabini*, in humans and animal hosts in  
70 China, along with a description of the spatial distribution and environmental  
71 characteristics of their endemic areas. We observe a wide distribution of *Paragonimus*  
72 infection in China, with a significant infection rate found in freshwater crabs and

73 crayfish. Our findings underscore the importance of avoiding the consumption of raw  
74 or undercooked freshwater products to prevent foodborne diseases, including  
75 paragonimiasis.

76

## 77 **Introduction**

78 Paragonimiasis is a food-borne zoonotic disease caused by several species of lung  
79 flukes belonging to genus *Paragonimus* [1]. It typically causes subacute to chronic  
80 pneumonia. The symptoms, including chronic cough, chest pain, dyspnea, and  
81 hemoptysis, mimic those of tuberculosis and lung cancer [2]. Human  
82 paragonimiasis is widely distributed in Asia, Americas, and Africa, and is  
83 still a significant neglected public health threat in China. An estimated 293.8 million  
84 individuals are at risk of *Paragonimus* infection, with 195 million of them residing in  
85 China [3, 4].

86 More than 30 *Paragonimus* species have been documented in China, among  
87 which *P. westermani* and *P. skrjabini* are the most important zoonotic species [2, 5]. *P.*  
88 *westermani* (Japanese lung fluke or oriental lung fluke) is most commonly distributed  
89 in eastern Asia and in South America, and is the most common cause of human  
90 paragonimiasis. *P. skrjabini* is especially prevalent in China, with cases appearing  
91 more recently in India and Vietnam as well. *P. westermani* followed by *P. skrjabini*  
92 are the major pathogens for human paragonimiasis in China.

93 Parasites of *Paragonimus* spp. have a three-host life cycle, with aquatic snails  
94 serving as the first intermediate host, freshwater decapod crustaceans as the second  
95 intermediate host, while human and other mammals as the definitive host. Human  
96 infection is acquired by eating inadequately cooked or pickled freshwater crabs or



97 cray fishes containing the infective forms called metacercariae [6, 7]. Drinking  
98 untreated stream or river water is also considered to be a possible route of infection  
99 [8].

100 Given the three host nature of the parasite and the fact that consuming raw or  
101 undercooked freshwater products is still popular in many areas of China, the infection  
102 status of *Paragonimus* in animal hosts is closely related to the epidemic of human  
103 paragonimiasis [9]. Therefore, comprehending the level of infection in animals will  
104 provide valuable insights for controlling human paragonimiasis. However,  
105 prevalence estimates of *Paragonimus* infection in the literature vary greatly  
106 across different studies. To date, there has been no comprehensive estimation of  
107 *Paragonimus* infection in humans and animal hosts. In addition, very few attempts  
108 at the spatial and environmental characteristics of *Paragonimus* infection in  
109 China have been made. Consequently, the aims of the current study are to  
110 summarize the infection level of two most important zoonotic *Paragonimus* species, *P.*  
111 *westermani* and *P. skrjabini*, in humans and animal hosts in China, and to describe the  
112 spatial distribution and environmental characteristics of their endemic areas.

113

## 114 **Method**

### 115 **Literature retrieval and selection**

116 This systematic review followed the Preferred Reporting Items for Systematic  
117 Reviews and Meta-analyses (PRISMA) reporting guidelines [10].

118 A systematic literature search was conducted to identify all studies reporting  
119 *Paragonimus* infection in humans and animals from inception to January 1, 2024,  
120 using the following electronic databases: China National Knowledge Infrastructure

121 (CNKI), Chinese Wanfang database (CWFD), Chongqing VIP, SinoMed, Medline,  
122 Embase, PubMed, and Web of Science. Full-text search was performed using the  
123 terms ‘paragonimiasis’, ‘*Paragonimus*’, ‘lung fluke’, ‘lung trematode’, in conjunction  
124 with ‘China’. The search was limited to English and Chinese languages.

125 After removing duplicates, two reviewers (KL and YC-S) independently  
126 reviewed all the titles and abstracts, with assistance of a third reviewer (RT-  
127 P) to reach a consensus in case of disagreement. Subsequently, the full texts  
128 were assessed for inclusion by the same reviewers. All studies included in  
129 the meta-analysis were published in English or Chinese, and were primary  
130 research articles, and epidemiological studies reporting infection rate of  
131 *Paragonimus* in humans and animal hosts. Studies were further excluded from  
132 meta-analysis if they were letters to the editor, non-epidemiological studies, or had a  
133 sample size of fewer than 20 [11]. Additionally, we collected case reports and case  
134 series of human infections to summarize the characteristics of cases of human  
135 paragonimiasis.

## 136 **Data extraction and quality assessment**

137 The following information was extracted from the included articles: title, first author,  
138 language, year of publication, year of investigation, study location, *Paragonimus*  
139 species, diagnostic techniques used in the study, sample size, number of positive cases,  
140 infection rate, and taxonomic category of animal host for infection in animals. In  
141 population-based surveys, the participants first underwent immunological testing  
142 (usually skin testing), and those who tested positive further underwent etiological  
143 testing. In this case, the infection rate was calculated using the total number of

144 participants as the denominator, with etiologically confirmed positives as the  
145 numerator.

146 Two reviewers (KL and YC-S) independently evaluated the quality of each  
147 included study using a standardized assessment tool developed by Hoy [12]. This tool  
148 provides ten items to assess the risk of bias, with each item given a score of 0 or 1 for  
149 the absence or presence of bias. A summary score of 0–3 indicates a low risk of bias,  
150 4–6 indicates a moderate risk of bias, and 7–10 indicates a high risk of bias.

## 151 **Statistical analysis**

152 Freeman-Tukey double arcsine transformation was used to normalize the infection  
153 rate and ensure the validity of subsequent analyses [13]. Heterogeneity across studies  
154 was assessed using Cochran's Q test and  $I^2$  statistics, where  $I^2$  statistics quantified the  
155 percentage of variation across studies (with  $I^2$  values indicating low, moderate, and  
156 high heterogeneity at 25%, 50%, and 75%, respectively). If the heterogeneity is  
157 statistically significant, a random-effects model was used for meta-analysis;  
158 otherwise, a fixed-effects model was used [14, 15]. The random-effects model was  
159 ultimately used to estimate the pooled prevalence in this study, following the results  
160 of the heterogeneity test. Additionally, subgroup and meta-regression analyses were  
161 employed to explore the potential source of heterogeneity across studies and assess  
162 the effects of moderators on the infection rates.

163  $R^2$ , QM and QE statistics were utilized to interpret the results of subgroup and  
164 meta-regression analyses [11].  $R^2$  represents the proportion of true heterogeneity that  
165 can be explained by the moderator; QM and its  $P$ -value determine the significance of  
166 the moderators in explaining heterogeneity; and QE and its  $P$ -value evaluate the  
167 significance of unexplained residual heterogeneity [16, 17].

168 Funnel plots and Egger's test were employed to assess potential publication bias.  
169 Sensitivity analyses were conducted to evaluate the robustness of the pooled estimate  
170 [18, 19]. Initially, outlier analyses were performed using Baujat plots. Studies located  
171 in the top right quadrant of the Baujat plot, or with studentized residuals exceeding 2  
172 in absolute value, were considered potential outliers. After removing identified  
173 outliers, the overall pooled prevalence estimates were recalculated and compared with  
174 the main findings. Furthermore, we examined whether excluding smaller-sample data  
175 points (i.e., data points with the lowest quintile of sample sizes) yielded findings  
176 similar to the main results.

177 All statistical analyses were performed using R4.2.1 software (Lucent  
178 Technologies, Jasmine Mountain, USA). For all tests, p values less than 0.05 were  
179 considered statistically significant.

## 180 **Data collection on environmental factors and visualization of** 181 **the spatial distribution and biogeographical characteristics**

182 Baidu Map was used to determine the latitude and longitude coordinates of each study  
183 location. For human infection, all etiological confirmed paragonimiasis cases  
184 documented in population surveys, case reports, and case series were included in the  
185 spatial analyses. Environmental factors for each location, including annual mean  
186 temperature, annual precipitation, mean temperature of warmest quarter, precipitation  
187 of warmest quarter, mean temperature of coldest quarter, precipitation of coldest  
188 quarter were obtained from the WorldClim database (<https://www.worldclim.org/>)  
189 [20]. Altitude data was obtained from the Space Shuttle Radar Topography Mission  
190 (SRTM, <http://www.gscloud.cn/>) [21].

191 To visualize the spatial distribution of *P. westermani* and *P. skrjabini* infection,  
192 we georeferenced the etiologically definite human paragonimiasis cases and the  
193 infection rates of various animal hosts, and plotted them on a map of China using  
194 software ArcGIS10.7 (Environmental System Research Institute, Redlands, USA).  
195 Additionally, scatter plots were used to illustrate the biogeographical characteristics  
196 of regions reporting *P. westermani* and *P. skrjabini* infection. T-tests were further  
197 conducted to explore the potential differences in biogeographical characteristics  
198 between the two *Paragonimus* species.

199

## 200 **Results**

### 201 **Literature selection and quality assessment**

202 Initially, 876 publications were identified through literature search. After removing  
203 duplicates, 10,642 articles were screened based on titles and abstracts, resulting in  
204 1,880 articles for full-text assessment. Following full-text assessments, 38 studies  
205 were ultimately included in the meta-analysis for human infections, 107 for snail  
206 infections, 172 for infections in the second intermediate host, and 22 for infections in  
207 animal reservoirs (Fig 1).

208

#### 209 **Fig 1. Flow diagram of study selection for the systematic review and meta-analysis**

210

211 In the risk of bias assessment, all the studies were rated as having low to  
212 moderate bias (S1-S4 Tables). Specifically, 6 out of 38 publications for human  
213 infections, 81 out of 107 publications for snail infections, 143 out of 172 for the

214 second intermediate hosts, and 20 out of 22 for animal reservoirs were rated as having  
215 low bias. The most common risk identified was the lack of random selection of the  
216 sample.

## 217 **Infection of *P. westermani* and *P. skrjabini* in humans**

218 A total of 28,948 cases of human paragonimiasis have been reported in the  
219 literature, of which 2,401 cases occurred after 2010, 14,654 cases were male, and  
220 6,089 cases were from rural areas (see Table 1). Notably, A total of 10,076 cases of  
221 infection in children or adolescents have been reported, with 8,695 cases reported  
222 before 2010 and 1,381 reported after 2010. As shown in Fig 2, human infections of  
223 *Paragonimus* have been documented in all provinces except for Tibet, Qinghai,  
224 Gansu, and Ningxia. The cases of human infection are mainly documented in  
225 provinces or municipalities in the Yangtze River Basin, including Chongqing (6,035),  
226 Zhejiang (5,324), Hubei (4,945), Sichuan (2,896), and Hunan (1,414), which together  
227 account for 71.12% of the total national cases (see Table 1). It is worth noting that  
228 after 2010, there are still a considerable number of reported cases in areas such as  
229 Chongqing (1,073) and Sichuan (595), and many other provinces and municipalities  
230 also continue to report cases.

231 Only a few cases differentiated whether the infection was caused by *P.*  
232 *westermani* and *P. skrjabini*. Cases of *P. westermani* infection are widely distributed,  
233 while *P. skrjabini* infections are primarily concentrated in more southern regions (Fig  
234 2).

235

236 **Table 1. Characteristics of human paragonimiasis cases documented in China**

|  | Before 1990 | 1990-1999 | 2000-2009 | After 2010 | Total |
|--|-------------|-----------|-----------|------------|-------|
|--|-------------|-----------|-----------|------------|-------|

| Province       |      |      |      |      |      |
|----------------|------|------|------|------|------|
| Chongqing      | 779  | 984  | 3199 | 1073 | 6035 |
| Zhejiang       | 1879 | 1649 | 1595 | 201  | 5324 |
| Hubei          | 2466 | 989  | 1440 | 50   | 4945 |
| Sichuan        | 640  | 537  | 1124 | 595  | 2896 |
| Guizhou        | 1202 | 295  | 197  | 149  | 1843 |
| Hunan          | 755  | 546  | 106  | 7    | 1414 |
| Shaanxi        | 489  | 311  | 161  | 14   | 975  |
| Liaoning       | 261  | 604  | 33   | 3    | 901  |
| Fujian         | 490  | 33   | 341  | 4    | 868  |
| Anhui          | 636  | 95   | 2    | 0    | 733  |
| Shanghai       | 182  | 193  | 215  | 26   | 616  |
| Heilongjiang   | 542  | 13   | 3    | 0    | 558  |
| Jiangsu        | 82   | 369  | 38   | 40   | 529  |
| Henan          | 176  | 104  | 44   | 64   | 388  |
| Beijing        | 99   | 24   | 12   | 67   | 202  |
| Shandong       | 0    | 176  | 5    | 0    | 181  |
| Jiangxi        | 157  | 9    | 6    | 0    | 172  |
| Yunnan         | 17   | 1    | 31   | 89   | 138  |
| Jilin          | 92   | 3    | 0    | 2    | 97   |
| Guangdong      | 4    | 23   | 19   | 15   | 61   |
| Shanxi         | 0    | 14   | 14   | 0    | 28   |
| Guangxi        | 1    | 23   | 1    | 0    | 25   |
| Hebei          | 9    | 1    | 1    | 1    | 12   |
| Hainan         | 0    | 0    | 3    | 0    | 3    |
| Inner Mongolia | 0    | 0    | 1    | 0    | 1    |
| Taiwan         | 0    | 0    | 0    | 1    | 1    |
| Tianjing       | 1    | 0    | 0    | 0    | 1    |
| Xinjiang       | 0    | 1    | 0    | 0    | 1    |
| Macao          | 0    | 0    | 0    | 0    | 0    |
| Gansu          | 0    | 0    | 0    | 0    | 0    |
| Ningxia        | 0    | 0    | 0    | 0    | 0    |
| Qinghai        | 0    | 0    | 0    | 0    | 0    |
| Tibet          | 0    | 0    | 0    | 0    | 0    |

|               |       |      |      |      |       |
|---------------|-------|------|------|------|-------|
| Hong Kong     | 0     | 0    | 0    | 0    | 0     |
| <b>Age</b>    |       |      |      |      |       |
| < 18          | 2613  | 2660 | 3422 | 1381 | 10076 |
| ≥ 18          | 386   | 454  | 298  | 229  | 1367  |
| Not specified | 7960  | 3883 | 4871 | 791  | 17505 |
| <b>Gender</b> |       |      |      |      |       |
| Male          | 4201  | 4227 | 4587 | 1639 | 14654 |
| Female        | 1677  | 1932 | 2220 | 677  | 6506  |
| Not specified | 5081  | 838  | 1784 | 85   | 7788  |
| <b>Source</b> |       |      |      |      |       |
| Urban         | 540   | 263  | 327  | 52   | 1182  |
| Rural         | 1462  | 1270 | 2992 | 365  | 6089  |
| Not specified | 8957  | 5464 | 5272 | 1984 | 21677 |
| <b>Total</b>  | 10959 | 6997 | 8591 | 2401 | 28948 |

237

238 **Fig 2. Spatial distribution of human paragonimiasis cases documented in China.**

239

240 A total of 38 studies, containing 662,003 participants, reported screening for  
241 *Paragonimus* infection in human populations (see S1 Table), with 253 confirmed  
242 cases being reported and pooled prevalence of 0.05% (95% CI: 0.00 - 0.12%). The  
243 heterogeneity across the studies was high ( $I^2 = 93.3\%$ , Table 2; forest plot shown in  
244 S1a Fig). Subgroup analysis and the meta-regression model indicated that none of the  
245 moderators could significantly explain the heterogeneity (see S5 Table).

246

247 **Table 2. Estimates of pooled prevalence and subgroup analysis of *Paragonimus* infection in**  
248 **humans**

|                      | No. of data points | Sample size   | No. of positive | Pooled prevalence, % (95% CI) | $I^2$ , %   | $R^2$ , % (QM P value) | QE P value         |
|----------------------|--------------------|---------------|-----------------|-------------------------------|-------------|------------------------|--------------------|
| <b>Pathogen</b>      | <b>54</b>          | <b>662003</b> | <b>253</b>      | <b>0.05 (0.00; 0.12)</b>      | <b>93.3</b> | <b>0.00 (0.575)</b>    | <b>&lt; 0.0001</b> |
| <i>P. westermani</i> | 30                 | 58811         | 127             | 0.07 (0.00; 0.19)             | 90.1        |                        |                    |



|                              |    |        |     |                   |      |                     |                    |
|------------------------------|----|--------|-----|-------------------|------|---------------------|--------------------|
| <i>P. skrjabini</i>          | 9  | 10636  | 22  | 0.04 (0.00; 0.22) | 87.1 |                     |                    |
| Not specified                | 15 | 592556 | 104 | 0.03 (0.00; 0.16) | 95.2 |                     |                    |
| <b>Year of investigation</b> |    |        |     |                   |      | <b>4.36 (0.290)</b> | <b>&lt; 0.0001</b> |
| Before 1990                  | 36 | 57540  | 184 | 0.08 (0.01; 0.20) | 88.4 |                     |                    |
| 1990–1999                    | 7  | 32729  | 35  | 0.08 (0.00; 0.33) | 91.6 |                     |                    |
| 2000–2010                    | 5  | 81900  | 25  | 0.02 (0.00; 0.21) | 66.7 |                     |                    |
| After 2010                   | 6  | 489834 | 9   | 0.00 (0.00; 0.06) | 33.0 |                     |                    |
| <b>Gender</b>                |    |        |     |                   |      | <b>4.17 (0.156)</b> | <b>&lt; 0.0001</b> |
| Man                          | 8  | 16340  | 1   | 0.00 (0.00; 0.11) | 0    |                     |                    |
| Woman                        | 7  | 5174   | 0   | 0.00 (0.00; 0.13) | 0    |                     |                    |
| Not specified                | 39 | 640489 | 252 | 0.09 (0.02; 0.19) | 95.2 |                     |                    |
| <b>Specimen</b>              |    |        |     |                   |      | <b>0.00 (0.357)</b> | <b>&lt; 0.0001</b> |
| Sputum                       | 38 | 100117 | 187 | 0.04 (0.00; 0.12) | 90.3 |                     |                    |
| Stool                        | 14 | 492277 | 22  | 0.03 (0.00; 0.18) | 79.2 |                     |                    |
| Stool or sputum              | 2  | 69609  | 44  | 0.45 (0.04; 1.27) | 98.5 |                     |                    |

249  $R^2$  represents the proportion of true heterogeneity that can be explained by the moderator, the **QE**

250  $P$  value shows the significance of residual heterogeneity that is unaccounted for by the moderator,

251 and the **QM**  $P$  value shows whether the moderator is statistically significant in explaining

252 heterogeneity.

253

## 254 **Infection of *P. westermani* and *P. skrjabini* in the first**

### 255 **intermediate hosts**

256 A total of 57 studies reported the presence of *P. westermani* infection in the first

257 intermediate host (snails), with prevalence ranging from 0.00% to 6.72% (see S2

258 Table). The pooled prevalence of *P. westermani* in the first intermediate host was 0.11%

259 (95%  $CI$ : 0.02–0.25%), and there was high heterogeneity across the studies ( $I^2=$

260 93.6%, Table 3; forest plot is presented in S1b Fig). *Semisulcospira* spp. was

261 identified as the most common vector of *P. westermani*, with a pooled prevalence of

262 0.12% (95%  $CI$ : 0.02–0.28%). Additionally, *Tricula* spp., *Erhaiini* spp., and

263 *Bythinella* spp. were identified as potential vectors of *P. westermani*.

264 Fifty studies reported *P. skrjabini* infection in the first intermediate host, with  
 265 prevalence varied from 0.00% to 14.80% (see S2 Table). The pooled prevalence of *P.*  
 266 *skrjabini* in the first intermediate host was 0.46% (95% CI: 0.27–0.70%), and the  
 267 heterogeneity across studies was high ( $I^2=93.4\%$ , Table 3; forest plot was shown in  
 268 S1c Fig). The majority of infections in snails were reported in *Tricola* spp., with a  
 269 pooled prevalence of 0.58% (95% CI: 0.28–0.96%). Additionally, *Pseudobythinella*  
 270 spp., *Bythinella* spp., *Semisulcospira* spp., *Oncomelania* spp., *Erhaiinispp.*, and  
 271 *Akiyoshia* spp. were also potential vectors of *P. skrjabini*.

272 Spatial distribution of *P. westermani* and *P. skrjabini* infection in the first  
 273 intermediate hosts is depicted in Fig 3. In the northeast area of China, *Semisulcospira*  
 274 spp. serve as the primary transmission vectors of *Paragonimus*, and only *P.*  
 275 *westermani* infection has been reported in this region. In more southern areas,  
 276 *Semisulcospira* spp. are identified as the primary transmission vectors of *P.*  
 277 *westermani*, while *Tricola* spp. are identified as the primary transmission vectors of *P.*  
 278 *skrjabini* (Figs 3a and 3b).

279 Subgroup analysis and the meta-regression model indicated that the infection rate  
 280 of *P. westermani* and *P. skrjabini* in the first intermediate host did not exhibit  
 281 significant differences across different snail genera and time periods (see Table 3, S6  
 282 Table).

283

284 **Table 3. Estimates of pooled prevalence and subgroup analysis of *Paragonimus* infection**  
 285 **in the first intermediate hosts**

|                      | No. of data points | Sample size | No. of positive | Pooled prevalence, % (95% CI) | $I^2$ , % | $R^2$ , % (QM P value) | QE P value |
|----------------------|--------------------|-------------|-----------------|-------------------------------|-----------|------------------------|------------|
| <i>P. westermani</i> | 61                 | 263423      | 639             | 0.11 (0.02; 0.25)             | 93.6      |                        |            |

|                              |           |               |             |                          |             |                     |                    |
|------------------------------|-----------|---------------|-------------|--------------------------|-------------|---------------------|--------------------|
| <b>Year of investigation</b> |           |               |             |                          |             | <b>3.35 (0.149)</b> | <b>&lt; 0.0001</b> |
| Before 1990                  | 32        | 120342        | 425         | 0.14 (0.01; 0.36)        | 91.7        |                     |                    |
| 1990–1999                    | 12        | 69290         | 52          | 0.04 (0.00; 0.27)        | 89.4        |                     |                    |
| 2000–2009                    | 11        | 58357         | 81          | 0.00 (0.00; 0.24)        | 85.6        |                     |                    |
| After 2010                   | 6         | 15434         | 81          | 0.62 (0.14; 1.39)        | 97.3        |                     |                    |
| <b>Genus of snail</b>        |           |               |             |                          |             | <b>0.00 (0.637)</b> | <b>&lt; 0.0001</b> |
| <i>Semisulcospira</i>        | 54        | 240158        | 599         | 0.12 (0.02; 0.28)        | 94.1        |                     |                    |
| <i>Tricula</i>               | 5         | 15918         | 11          | 0.04 (0.00; 0.41)        | 62.5        |                     |                    |
| <i>Erhaiini</i>              | 1         | 6227          | 26          | 0.42 (0.00; 2.49)        | NE          |                     |                    |
| <i>Bythinella</i>            | 1         | 1120          | 3           | 0.27 (0.00; 2.27)        | NE          |                     |                    |
| <b><i>P. skrjabini</i></b>   | <b>75</b> | <b>411797</b> | <b>1343</b> | <b>0.46 (0.27; 0.70)</b> | <b>93.4</b> |                     |                    |
| <b>Year of investigation</b> |           |               |             |                          |             | <b>0.00 (0.678)</b> | <b>&lt; 0.0001</b> |
| Before 1990                  | 22        | 112904        | 428         | 0.52 (0.18; 1.01)        | 92.6        |                     |                    |
| 1990–1999                    | 14        | 75143         | 247         | 0.34 (0.02; 0.90)        | 93.9        |                     |                    |
| 2000–2009                    | 24        | 193038        | 502         | 0.34 (0.07; 0.75)        | 91.9        |                     |                    |
| After 2010                   | 15        | 30712         | 166         | 0.74 (0.26; 1.43)        | 95.5        |                     |                    |
| <b>Genus of snail</b>        |           |               |             |                          |             | <b>0.00 (0.830)</b> | <b>&lt; 0.0001</b> |
| <i>Tricula</i>               | 36        | 253031        | 643         | 0.58 (0.28; 0.96)        | 94.6        |                     |                    |
| <i>Pseudobythinella</i>      | 11        | 64914         | 340         | 0.57 (0.11; 1.32)        | 90.5        |                     |                    |
| <i>Bythinella</i>            | 10        | 9481          | 79          | 0.41 (0.01; 1.19)        | 84.7        |                     |                    |
| <i>Semisulcospira</i>        | 9         | 63806         | 178         | 0.06 (0.00; 0.60)        | 79.6        |                     |                    |
| <i>Erhaiini</i>              | 3         | 5789          | 26          | 0.80 (0.00; 2.66)        | 92.4        |                     |                    |
| <i>Akiyoshia</i>             | 3         | 2575          | 20          | 0.71 (0.00; 2.48)        | 89.5        |                     |                    |
| <i>Oncomelania</i>           | 2         | 10925         | 57          | 0.20 (0.00; 2.28)        | 0.0         |                     |                    |
| <i>Assiminea</i>             | 1         | 1276          | 0           | 0.00 (0.00; 1.83)        | NE          |                     |                    |

286 NE: not estimated;  $R^2$  represents the proportion of true heterogeneity that can be explained by the  
287 moderator, the **QE**  $P$  value shows the significance of residual heterogeneity that is unaccounted  
288 for by the moderator, and the **QM**  $P$  value shows whether the moderator is statistically significant  
289 in explaining heterogeneity.

290

291 **Fig 3. Spatial distribution of *P. westermani* and *P. skrjabini* infection in the first**  
292 **intermediate hosts in China. (a) *P. westermani* infection in the first intermediate hosts; (b)**  
293 ***P. skrjabini* infection in the first intermediate hosts**

294

295 **Infection of *P. westermani* and *P. skrjabini* in the second**  
296 **intermediate hosts**

297 In total, 94 studies reported *P. westermani* infection in the second intermediate host  
298 (see S3 Table), with a pooled prevalence of 52.02% (95% CI: 44.35–59.64%) and  
299 high heterogeneity across studies ( $I^2 = 99.6\%$ , Table 4; forest plot presented in S1d  
300 Fig). Genus *Cambaroides* was identified as the primary second intermediate host for  
301 *P. westermani* in the northeastern areas of China (Fig 4a), with a pooled prevalence of  
302 59.79% (95% CI: 42.65 - 75.79%; Table 4). In other areas of China, *Sinopotamon* spp.  
303 were the primary second intermediate host, with a pooled prevalence of 52.86% (95%  
304 CI: 43.68 – 61.94%); other freshwater crabs such as *Nanhaipotamon* spp. and  
305 *Huananpotamon* spp. could also serve as the second intermediate host (see Table 4,  
306 S3 Table).

307 Eighty-one studies reported *P. skrjabini* infection in the second intermediate host  
308 (see S3 Table), with a pooled prevalence of 30.37% (95% CI: 24.72–36.34%) and  
309 high heterogeneity across studies ( $I^2 = 99.8\%$ , Table 4; forest plot presented in S1e  
310 Fig). In the northeastern region of China, only *P. westermani* has been reported in the  
311 second intermediate host, with no reports of the existence of *P. skrjabini* (see Fig 4b).  
312 The second intermediate hosts of *P. skrjabini* included crabs of the Potamidae,  
313 Lithodidae, and Parathelphusidae families. Crabs of the Potamidae family were the  
314 most common second intermediate host, with *Sinopotamon* spp. being the most  
315 significant, exhibiting a pooled prevalence of 31.53% (95% CI: 24.92% - 38.53%).  
316 Additionally, other freshwater crabs such as *Nanhaipotamon* spp., *Potamon* spp., and  
317 *Tenuilapotamon* spp. of the Potamidae family, *Somanniathelphusa* spp. of the

318 Parathelphusidae family, and *Malayopotamon* spp. of the Lithodidae family can also  
 319 serve as the second intermediate hosts for *P. skrjabini* (see Table 4).

320 Subgroup analysis and the meta-regression model indicated that the infection  
 321 rates of *P. westermanni* and *P. skrjabini* in the second intermediate host did not exhibit  
 322 significant differences among different crustacean genera, across different time  
 323 periods, and with different detection methods (see Table 4, S7 Table).

324

325 **Table 4. Estimates of pooled prevalence and subgroup analysis of *Paragonimus* infection in**  
 326 **the second intermediate hosts**

|                              | No. of data points | Sample size   | No. of positive | Pooled prevalence, % (95% CI) | $I^2$ , %   | $R^2$ , % (QM P value) | QE P value         |
|------------------------------|--------------------|---------------|-----------------|-------------------------------|-------------|------------------------|--------------------|
| <i>P. westermanni</i>        | <b>100</b>         | <b>165276</b> | <b>40049</b>    | <b>52.02 (44.35; 59.64)</b>   | <b>99.6</b> |                        |                    |
| <b>Year of investigation</b> |                    |               |                 |                               |             | <b>3.27 (0.097)</b>    | <b>&lt; 0.0001</b> |
| Before 1990                  | 44                 | 86716         | 24212           | 62.67 (51.44; 73.25)          | 99.5        |                        |                    |
| 1990–1999                    | 15                 | 66150         | 10488           | 43.24 (24.96; 62.51)          | 99.8        |                        |                    |
| 2000–2009                    | 22                 | 6490          | 2762            | 41.69 (26.41; 57.82)          | 98.8        |                        |                    |
| After 2010                   | 19                 | 5920          | 2587            | 45.80 (29.06; 63.03)          | 99.5        |                        |                    |
| <b>Genus of hosts</b>        |                    |               |                 |                               |             | <b>0.00 (0.492)</b>    | <b>&lt; 0.0001</b> |
| <i>Sinopotamon</i>           | 70                 | 157429        | 35929           | 52.86 (43.68; 61.94)          | 99.7        |                        |                    |
| <i>Nanhaipotamon</i>         | 3                  | 175           | 53              | 26.02 (0.26; 69.67)           | 95.0        |                        |                    |
| <i>Huananpotamon</i>         | 2                  | 1349          | 697             | 27.65 (0.00; 79.19)           | 98.8        |                        |                    |
| <i>Malayopotamon</i>         | 1                  | 21            | 3               | 14.29 (0.00; 88.26)           | NE          |                        |                    |
| <i>Lithodes</i>              | 1                  | 72            | 61              | 84.72 (14.42; 100.00)         | NE          |                        |                    |
| <i>Eriocheir</i>             | 1                  | 85            | 16              | 18.82 (0.00; 88.53)           | NE          |                        |                    |
| <i>Cambaroides</i>           | 20                 | 5515          | 3110            | 59.79 (42.65; 75.79)          | 99.4        |                        |                    |
| <i>Macrobrachium</i>         | 2                  | 630           | 180             | 28.57 (0.00; 79.70)           | 0.00        |                        |                    |
| <b>Detection method</b>      |                    |               |                 |                               |             | <b>0.00 (0.501)</b>    | <b>&lt; 0.0001</b> |
| Artificial digestion         | 55                 | 94460         | 26665           | 50.15 (39.81; 60.49)          | 99.4        |                        |                    |
| Direct compression           | 25                 | 8923          | 4135            | 59.75 (44.42; 74.17)          | 99.5        |                        |                    |
| Not specified                | 20                 | 61893         | 9249            | 47.42 (30.79; 64.34)          | 99.7        |                        |                    |
| <i>P. skrjabini</i>          | <b>109</b>         | <b>198209</b> | <b>41426</b>    | <b>30.37 (24.72; 36.34)</b>   | <b>99.8</b> |                        |                    |

|                              |    |        |       |                       |      |                     |                    |
|------------------------------|----|--------|-------|-----------------------|------|---------------------|--------------------|
| <b>Year of investigation</b> |    |        |       |                       |      | <b>1.90 (0.184)</b> | <b>&lt; 0.0001</b> |
| Before 1990                  | 24 | 21578  | 4833  | 32.76 (19.69; 47.33)  | 99.1 |                     |                    |
| 1990–1999                    | 22 | 84633  | 6773  | 21.85 (11.35; 34.57)  | 99.8 |                     |                    |
| 2000–2009                    | 23 | 66211  | 23849 | 40.59 (27.31; 54.59)  | 99.9 |                     |                    |
| After 2010                   | 40 | 25787  | 5971  | 30.13 (18.95; 42.62)  | 99.2 |                     |                    |
| <b>Genus of hosts</b>        |    |        |       |                       |      | <b>7.59 (0.065)</b> | <b>&lt; 0.0001</b> |
| <i>Sinopotamon</i>           | 74 | 167883 | 37566 | 31.53 (24.92; 38.53)  | 99.8 |                     |                    |
| <i>Nanhaipotamon</i>         | 7  | 1318   | 480   | 34.30 (13.74; 58.42)  | 80.5 |                     |                    |
| <i>Potamon</i>               | 5  | 1911   | 458   | 26.03 (6.31; 53.05)   | 99.1 |                     |                    |
| <i>Tenuilapotamon</i>        | 3  | 3195   | 2182  | 27.96 (3.52; 63.48)   | 99.6 |                     |                    |
| <i>Aparapotamon</i>          | 3  | 1880   | 307   | 15.66 (0.00; 48.85)   | 78.0 |                     |                    |
| <i>Bottapotamon</i>          | 3  | 189    | 127   | 75.72 (39.60; 98.48)  | 96.1 |                     |                    |
| <i>Malayopotamon</i>         | 2  | 104    | 62    | 42.94 (5.44; 85.95)   | 95.8 |                     |                    |
| <i>Huananpotamon</i>         | 2  | 82     | 27    | 33.89 (1.83; 78.46)   | 0.0  |                     |                    |
| <i>Sinolapotamon</i>         | 1  | 3596   | 6     | 0.17 (0.00; 38.11)    | NE   |                     |                    |
| <i>Tiwaripotamon</i>         | 1  | 3898   | 2     | 0.05 (0.00; 36.44)    | NE   |                     |                    |
| <i>Neilupotamon</i>          | 1  | 116    | 6     | 5.17 (0.00; 58.20)    | NE   |                     |                    |
| <i>Parvuspotamon</i>         | 1  | 223    | 73    | 32.74 (0.00; 89.38)   | NE   |                     |                    |
| <i>Potamiscus</i>            | 1  | 24     | 23    | 95.83 (38.43; 100.00) | NE   |                     |                    |
| <i>Tenuipotamon</i>          | 1  | 141    | 38    | 26.95 (0.00; 85.44)   | NE   |                     |                    |
| <i>Lithodes</i>              | 3  | 13627  | 69    | 9.41 (0.00; 39.93)    | 97.0 |                     |                    |
| <i>Somanniathelphusa</i>     | 1  | 22     | 0     | 0.00 (0.00; 47.47)    | NE   |                     |                    |
| <b>Detection method</b>      |    |        |       |                       |      | <b>1.75 (0.135)</b> | <b>&lt; 0.0001</b> |
| Artificial digestion         | 68 | 172632 | 35089 | 26.01 (19.38; 33.23)  | 99.9 |                     |                    |
| Direct compression           | 28 | 17125  | 4220  | 36.91 (25.41; 49.19)  | 98.3 |                     |                    |
| Not specified                | 13 | 8452   | 2117  | 40.59 (23.73; 58.66)  | 99.2 |                     |                    |

327 NE: not estimated;  $R^2$  represents the proportion of true heterogeneity that can be explained by the  
328 moderator, the QE  $P$  value shows the significance of residual heterogeneity that is unaccounted  
329 for by the moderator, and the QM  $P$  value shows whether the moderator is statistically significant  
330 in explaining heterogeneity.

331

332 **Fig 4. Spatial distribution of *P. westermani* and *P. skrjabini* infection in the second**  
333 **intermediate hosts in China. (a) *P. westermani* infection in the second intermediate hosts;**  
334 **(b) *P. skrjabini* infection in the second intermediate hosts.**

335

336 **Infection of *P. westermani* and *P. skrjabini* in animal**  
337 **reservoirs**

338 Overall, 10 studies reported *P. westermani* infection in animal reservoirs (see S4  
339 Table), with a pooled prevalence of 21.40% (95% CI: 7.82–38.99%) and high  
340 heterogeneity across studies ( $I^2 = 94.9\%$ , Table 5; forest plot presented in S1g Fig).  
341 Cats (37.15% (95% CI: 9.61 - 69.92%)) and dogs (11.68% (95% CI: 0.00 - 36.56%))  
342 were identified as the most common animal reservoirs for *P. westermani*.

343 Twelve studies reported *P. skrjabini* infection in animal reservoirs (see S4 Table),  
344 with a pooled prevalence of 20.31% (95% CI: 9.69–33.38%) and high heterogeneity  
345 across studies ( $I^2 = 95.2\%$ , Table 5; forest plot presented in S1f Fig). Similar to *P.*  
346 *westermani*, cats (36.35% (95% CI: 20.74–53.51 %)) and dogs (5.79% (95% CI:  
347 0.00–23.03 %)) were identified the most common animal reservoirs for *P. skrjabini*.

348 Subgroup analysis and meta-regression models indicated that animal categories,  
349 lifestyle (wild or domestic), or detection methods could significantly explain the  
350 observed heterogeneity (see Table 5, S8 Table).

351

352 **Table 5. Estimates of pooled prevalence and subgroup analysis of *Paragonimus* infection**  
353 **in animal reservoirs**

|                              | No. of data points | Sample size | No. of positive | Pooled prevalence, % (95% CI) | $I^2$ , % | $R^2$ , % (QM $P$ value) | QE $P$ value       |
|------------------------------|--------------------|-------------|-----------------|-------------------------------|-----------|--------------------------|--------------------|
| <i>P. westermani</i>         | 13                 | 1353        | 307             | 21.40 (7.82; 38.99)           | 94.9      |                          |                    |
| <b>Year of investigation</b> |                    |             |                 |                               |           | <b>5.40 (0.266)</b>      | <b>&lt; 0.0001</b> |
| Before 1990                  | 7                  | 999         | 275             | 34.00 (12.82; 59.07)          | 94.0      |                          |                    |
| 1990–1999                    | 3                  | 269         | 25              | 12.25 (0.00; 46.27)           | 95.2      |                          |                    |
| After 2010                   | 3                  | 85          | 7               | 6.37 (0.00; 37.97)            | 75.4      |                          |                    |

|                              |           |             |            |                            |             |                      |                    |
|------------------------------|-----------|-------------|------------|----------------------------|-------------|----------------------|--------------------|
| <b>Family of hosts</b>       |           |             |            |                            |             | <b>0.00 (0.609)</b>  | <b>&lt; 0.0001</b> |
| Canidae                      | 6         | 936         | 210        | 11.68 (0.00; 36.56)        | 96.2        |                      |                    |
| Felidae                      | 5         | 299         | 74         | 37.15 (9.61; 69.92)        | 96.1        |                      |                    |
| Viverridae                   | 1         | 66          | 13         | 19.70 (0.00; 85.85)        | NE          |                      |                    |
| Mustelidae                   | 1         | 52          | 10         | 19.23 (0.00; 85.87)        | NE          |                      |                    |
| <b>Life style</b>            |           |             |            |                            |             | <b>0.00 (0.702)</b>  | <b>&lt; 0.0001</b> |
| Domestic                     | 10        | 1214        | 274        | 24.70 (4.93; 40.41)        | 96.1        |                      |                    |
| Wild                         | 3         | 139         | 33         | 22.57 (1.18; 68.23)        | 69.3        |                      |                    |
| <b>Detection method</b>      |           |             |            |                            |             | <b>0.00 (0.545)</b>  | <b>&lt; 0.0001</b> |
| Sedimentation                | 2         | 55          | 7          | 12.44 (0.00; 60.11)        | 42.5        |                      |                    |
| Direct compression           | 2         | 54          | 22         | 41.81 (2.41; 89.04)        | 0.00        |                      |                    |
| Kato-Katz                    | 1         | 30          | 0          | 0.00 (0.00; 51.65)         | NE          |                      |                    |
| Not specified                | 8         | 1214        | 278        | 23.59 (6.13; 47.41)        | 96.6        |                      |                    |
| <b><i>P. skrjabini</i></b>   | <b>20</b> | <b>1067</b> | <b>180</b> | <b>20.31 (9.69; 33.38)</b> | <b>95.2</b> |                      |                    |
| <b>Year of investigation</b> |           |             |            |                            |             | <b>10.34 (0.168)</b> | <b>&lt;0.0001</b>  |
| Before 1990                  | 5         | 199         | 53         | 30.53 (8.60; 58.19)        | 94.5        |                      |                    |
| 1990–1999                    | 5         | 408         | 17         | 3.52 (0.00; 21.03)         | 91.3        |                      |                    |
| 2000–2009                    | 5         | 167         | 56         | 30.31 (8.36; 58.09)        | 83.4        |                      |                    |
| After 2010                   | 5         | 293         | 54         | 23.88 (4.94; 50.39)        | 96.3        |                      |                    |
| <b>Family of hosts</b>       |           |             |            |                            |             | <b>26.53 (0.046)</b> | <b>&lt; 0.0001</b> |
| Felidae                      | 11        | 433         | 146        | 36.35 (20.74; 53.51)       | 93.7        |                      |                    |
| Canidae                      | 5         | 319         | 20         | 5.79 (0.00; 23.03)         | 79.5        |                      |                    |
| Muridae                      | 1         | 223         | 0          | 0.00 (0.00; 29.15)         | NE          |                      |                    |
| Viverridae                   | 1         | 43          | 8          | 18.60 (0.00; 72.12)        | NE          |                      |                    |
| Suidae                       | 1         | 21          | 0          | 0.00 (0.00; 39.21)         | NE          |                      |                    |
| Mustelidae                   | 1         | 28          | 6          | 21.43 (0.00; 76.78)        | NE          |                      |                    |
| <b>Life style</b>            |           |             |            |                            |             | <b>20.34 (0.018)</b> | <b>&lt; 0.0001</b> |
| Domestic                     | 11        | 480         | 130        | 33.12 (17.50; 50.78)       | 95.3        |                      |                    |
| Wild                         | 9         | 587         | 50         | 8.09 (0.40; 22.06)         | 92.3        |                      |                    |
| <b>Detection method</b>      |           |             |            |                            |             | <b>25.37 (0.029)</b> | <b>&lt; 0.0001</b> |
| Direct compression           | 6         | 231         | 90         | 45.69 (23.38; 68.90)       | 92.7        |                      |                    |
| Sedimentation                | 9         | 542         | 65         | 13.88 (3.16; 29.65)        | 94.9        |                      |                    |
| Kato-Katz                    | 2         | 194         | 5          | 1.28 (0.00; 24.62)         | 70.6        |                      |                    |
| Not specified                | 3         | 100         | 20         | 15.93 (0.05; 46.32)        | 89.7        |                      |                    |

354 NE: not estimated;  $R^2$  represents the proportion of true heterogeneity that can be explained by the

355 moderator, the QE  $P$  value shows the significance of residual heterogeneity that is unaccounted



356 for by the moderator, and the **QM** *P* value shows whether the moderator is statistically significant  
357 in explaining heterogeneity.

358

### 359 **Publish bias and sensitivity analysis**

360 Asymmetry in the funnel plots and the results of Egger's test indicated the presence of  
361 publication bias (see S2 Fig). The sensitivity analysis results demonstrated that the  
362 pooled prevalence estimate did not change significantly after the removal of outlier  
363 data points or data points with small sample sizes (95% *CI* overlapped; see S9 Table).

364

### 365 **Biogeographical characteristics of *P. westermani* and *P.*** 366 ***skrjabini* infections**

367 To investigate the biogeographical characteristics of *Paragonimus* occurrences, we  
368 created scatter plots using the climate features of *P. westermani* and *P. skrjabini*  
369 endemic sites and 1000 random points. The results indicate that, compared to random  
370 points, endemic sites of *P. westermani* and *P. skrjabini* are mainly distributed in  
371 regions with lower altitude and higher temperature and precipitation (see S10 Table  
372 and Fig 5). Specifically, endemic sites of *P. westermani* are predominantly distributed  
373 in areas with an altitude below 1166.0m, annual temperature above 1.0°C, annual  
374 precipitation above 541.0mm, mean temperature of the warmest quarter above 18.3°C,  
375 and precipitation of the warmest quarter above 304.0mm. On the other hand, endemic  
376 sites of *P. skrjabini* are distributed in areas with altitude below 2188.0m, annual  
377 temperature above 10.9°C, annual precipitation above 578.0mm, mean temperature of  
378 the warmest quarter above 19.5°C, and precipitation of the warmest quarter above  
379 257.0mm. When comparing the two *Paragonimus* species, the endemic points of *P.*

380 *westermani* have lower altitudes (below 1166.0m for *P. westermani*; 2188.0m for *P.*  
381 *skrjabini*) and lower mean temperature of the coldest quarter (above -20.1°C for *P.*  
382 *westermani*; -0.8°C for *P. skrjabini*).

383

384 **Fig 5. Environmental characteristics of areas with reported *Paragonimus* infections in**  
385 **China.**

386

## 387 **Discussion**

388 In this study, we summarized the infection status and geographical distribution of *P.*  
389 *westermani* and *P. skrjabini* in humans and animal hosts in China. Our findings  
390 indicate that *Paragonimus* infection is widely distributed and remains prevalent in  
391 China, with variations in the transmission vectors, second intermediate hosts, and  
392 geographical distribution between *P. westermani* and *P. skrjabini*. Furthermore,  
393 environmental factors such as temperature and precipitation may influence the  
394 distribution of *Paragonimus*.

395 After years of educational efforts, the reported number of human paragonimiasis  
396 cases has significantly decreased in most areas of China (see Table 1). However, it is  
397 noteworthy that after 2010, a considerable number of reported cases persist in areas  
398 such as Chongqing (1073) and Sichuan (595), with many other provinces and  
399 municipalities also continuing to report cases, highlighting the need for ongoing  
400 control efforts against paragonimiasis. Another notable issue is the significant  
401 involvement of children and adolescents in paragonimiasis cases, both before and  
402 after 2010 [22-24]. In certain endemic areas, particularly in rural or mountainous  
403 regions, practices such as local children drinking untreated water and consuming

404 undercooked shrimp and crab are more common among children compared to adults  
405 [25, 26], underscoring the necessity for enhanced health education on paragonimiasis  
406 in schools in key areas. Additionally, human infection may be more widespread and  
407 underestimated due to a lack of training of health workers to identify paragonimiasis  
408 and a deficient case-reporting system [27].

409       The distribution regions of *P. westermani* and *P. skrjabini* in China exhibit both  
410 differences and overlaps. In the northeastern areas of China, only *P. westermani* has  
411 been documented, while in the southern part of China, both species coexist. The  
412 difference in the distribution of the two *Paragonimus* species is likely due to  
413 variations in their second intermediate hosts. Specifically, *Sinopotamon*, primarily  
414 distributed in the southern part of China, serves as the main second intermediate host  
415 for both *P. westermani* and *P. skrjabini* [28, 29]. On the other hand, *Cambaroides*,  
416 which inhabits the northeastern region of China, can only serve as the second  
417 intermediate host for *P. westermani* [30]. On the other hand, *Cambaroides*, which  
418 inhabits the northeastern region of China, can only serve as the second intermediate  
419 host for *P. westermani* [30]. It has been reported that *P. westermani* and *P. skrjabini*  
420 share some common intermediate hosts, such as *Semisulcospira*, *Tricula*, *Erhaiini*,  
421 and *Bythinella* in the first intermediate host, and *Huananpotamon* in the second  
422 intermediate host [31, 32]. Additionally, the cercariae and metacercariae of *P.*  
423 *westermani* and *P. skrjabini* are morphologically similar[33]. Therefore, in areas  
424 where the two *Paragonimus* species overlap, there may be misclassification when  
425 detecting the infection in intermediate hosts. To accurately differentiate between the  
426 different *Paragonimus* species, nucleic acid detection is recommended to be  
427 conducted simultaneously in epidemiological surveys.

428       The infection rates of *Paragonimus* in intermediate hosts exhibit significant

429 variation. In the first intermediate host, the infection rate of *P. westermani* ranged  
430 from 0.00% to 6.72%, while the infection rate of *P. skrjabini* ranged from 0.00% to  
431 14.80% (see S2 Table). In the second intermediate host, the infection rate ranged from  
432 0% to 100% (see S3 Table). None of the known moderators, including the taxonomic  
433 category of the intermediate host, year of survey, and detection methods, can  
434 significantly explain the heterogeneity across studies (see S6 and S7 Tables).  
435 Therefore, it is necessary to conduct random sampling surveys in different regions to  
436 further understand the factors that influence the infection rates of *Paragonimus* in  
437 intermediate hosts.

438 In many regions of China, it is common for residents to consume marinated or  
439 drunken crabs in their raw state [4, 34]. However, the methods of salting and soaking  
440 in alcohol are not completely effective in killing the metacercariae [35, 36]. Another  
441 prevalent practice is the consumption of freshwater crabs and crayfish through stir-  
442 frying, but inadequate heating may not fully eliminate the parasites [37, 38]. Human  
443 infection occurs through the consumption of inadequately cooked freshwater  
444 crustaceans containing the infective metacercariae. Given the persistently high  
445 infection rates of *Paragonimus* in the second intermediate host (with a pooled  
446 prevalence of 52.02% (95% CI: 42.65 - 75.79%) for *P. westermani* and 30.37% (95%  
447 CI: 24.72 - 36.34%) for *P. skrjabini*; see Table 4), and the continued popularity of  
448 consuming raw or undercooked freshwater crustaceans in many areas of China,  
449 paragonimiasis remains a significant public health threat to the Chinese population.

450 The analysis of biogeographical characteristics revealed that temperature and  
451 precipitation might influence the distribution of *Paragonimus* (see Fig. 4).  
452 Temperature may affect the distribution of *Paragonimus* by influencing the survival  
453 of the intermediate host (snails and crustaceans) or by affecting the development of

454 *Paragonimus*. For example, research by Hu et al. indicates that the development of  
455 the eggs of *P. heterotremus* is closely related to the external temperature [39].  
456 Development is slow or even halted at temperatures below 12°C, and does not occur  
457 at temperatures above 37°C. Chiu has found that the optimum temperature for the  
458 development of *P. iloktsuensis* in *T. chiui* is 22 to 30°C [40]. Our study results  
459 indicate that, compared to *P. skrjabini*, *P. westermani* can survive in regions with  
460 lower temperatures, such as northeastern China (see Fig. 5), suggesting that *P.*  
461 *westermani* exhibits great tolerance to low temperatures. Similarly, Fan and  
462 colleagues have found that metacercariae of *P. westermani* can still develop into  
463 mature worms in rats after storage at 4°C for up to 234 days [41].

464 *Paragonimus* infections have been predominantly documented in eastern China.  
465 This geographical distribution is closely associated with water supply, with  
466 precipitation playing a crucial role in the distribution of aquatic snails and crustaceans  
467 [42], both of which are integral to the *Paragonimus* life cycle. The higher levels of  
468 precipitation in eastern China create environments that are more conducive to the  
469 survival and proliferation of intermediate hosts, thereby increasing the risk of  
470 *Paragonimus* infections in these areas [43].

471 In this study, we pooled studies from numerous sites to achieve a relatively large  
472 sample size to summarize the infection rate of *P. westermani* and *P. skrjabini* in  
473 humans, intermediate hosts, and animal reservoirs. However, several limitations of  
474 our study should be considered. Firstly, the absence of literature reporting  
475 *Paragonimus* infections in certain areas does not necessarily indicate that  
476 *Paragonimus* infections do not exist there; it may be due to a lack of research in those  
477 areas or unpublished research findings. Secondly, significant heterogeneity was  
478 detected across studies, and most of the heterogeneity could not be explained by

479 known moderators. Lastly, publication bias exists in this study, which may cause bias  
480 in the estimates of pooled prevalence. Therefore, the results of our study should be  
481 interpreted with caution. Despite these limitations, our study systematically  
482 summarizes the infection status of *P. westermani* and *P. skrjabini* in humans,  
483 intermediate hosts, and animal reservoirs in China, and elucidates their spatial  
484 distribution. The findings may provide valuable insights for the control of  
485 paragonimiasis in China.

486

## 487 **Conclusions**

488 *Paragonimus* infection remains widely distributed and prevalent in China, with  
489 children and adolescents at high risk in endemic areas. Variations exist in the  
490 intermediate hosts and geographical distribution of *P. westermani* and *P. skrjabini*  
491 infections in China. *P. skrjabini* infections are predominantly concentrated in more  
492 southern regions compared to *P. westermani*. Additionally, temperature and  
493 precipitation may influence the distribution of *P. westermani* and *P. skrjabini*.

494

## 495 **Financial Disclosure Statement**

496 This research was funded by the Shandong Provincial Natural Science Foundation  
497 (<https://cloud.kjt.shandong.gov.cn/>) (grant no. ZR2019MH093, ZR2023MH313), the  
498 Shandong Provincial Youth Innovation Team Development Plan of Colleges and  
499 Universities (<http://edu.shandong.gov.cn/>) (grant no. 2019-6-156, Lu-Jiao), the  
500 National Parasite Resource Bank (<https://www.most.gov.cn/index.html>) (grant no.  
501 NPRC-2019-194-30), the Quality Education Teaching Resources Project of Shandong

502 Province and Weifang Medical University (<http://edu.shandong.gov.cn/>) (grant no.  
503 SDYAL2022152, 22YZSALK01, 23YJSALK01), Joint Research Program of China  
504 National Center for Food Safety Risk Assessment (<https://cfsa.net.cn/>) (grant no.  
505 LH2022GG08, LH2022GG02), and the National Natural Science Foundation of  
506 China (<https://www.nsf.gov.cn/>) (grant no. 81902905).

507 The funders had no role in study design, data collection and analysis, decision to  
508 publish, or preparation of the manuscript.

509

## 510 **Author Contributions**

511 Conceptualization: Lan-Hua Li, Yan Lu, Fu-Yan Shi.

512 Data curation: Kai Liu, Yuan-Chao Sun, Rui-Tai Pan, Ao-Long Xu, Han Xue.

513 Formal analysis: Kai Liu, Na Tian, Jin-Xin Zheng.

514 Supervision: Lan-Hua Li, Yan Lu, Fu-Yan Shi.

515 Visualization: Rui-Tai Pan, Ao-Long Xu, Han Xue, Jin-Xin Zheng.

516 Writing – original draft: Kai Liu, Yuan-Chao Sun.

517 Writing – review & editing: Jin-Xin Zheng, Fu-Yan Shi, Yan Lu, Lan-Hua Li.

518

## 519 **References**

520 1. Singh TS, Sugiyama H, Rangsiruji A. *Paragonimus* & paragonimiasis in India. Indian J  
521 Med Res. 2012;136(2):192-204.

522 2. Yoshida A, Doanh PN, Maruyama H. *Paragonimus* and paragonimiasis in Asia: An  
523 update. Acta Trop. 2019;199:105074, doi:10.1016/j.actatropica.2019.105074.

- 524 3. Keiser J, Utzinger J. Emerging foodborne trematodiasis. *Emerg Infect Dis.*  
525 2005;11(10):1507-14, doi:10.3201/eid1110.050614.
- 526 4. Liu Q, Wei F, Liu W, Yang S, Zhang X. Paragonimiasis: an important food-borne  
527 zoonosis in China. *Trends Parasitol.* 2008;24(7):318-23, doi:10.1016/j.pt.2008.03.014.
- 528 5. Blair D, Xu ZB, Agatsuma T. Paragonimiasis and the genus *Paragonimus*. *Adv Parasitol.*  
529 1999;42:113-222, doi:10.1016/s0065-308x(08)60149-9.
- 530 6. Feng Y, Fürst T, Liu L, Yang GJ. Estimation of disability weight for paragonimiasis: a  
531 systematic analysis. *Infect Dis Poverty.* 2018;7(1):110, doi:10.1186/s40249-018-0485-5.
- 532 7. Lu XT, Gu QY, Limpanont Y, Song LG, Wu ZD, Okanurak K, et al. Snail-borne  
533 parasitic diseases: an update on global epidemiological distribution, transmission interruption  
534 and control methods. *Infect Dis Poverty.* 2018;7(1):28, doi:10.1186/s40249-018-0414-7.
- 535 8. Huang YX, Zhang S, Sheng Y, Liang J, Wang J, Liu XW, et al. Investigation of  
536 *Paragonimus westermani* host in Kuandian County of Liaoning province. *J Med Pest Control.*  
537 2016;32(04):420-1 (in Chinese).
- 538 9. Vélez I, Velásquez LE, Vélez ID. Morphological description and life cycle of  
539 *Paragonimus* sp. (Trematoda: Troglotrematidae): causal agent of human paragonimiasis in  
540 Colombia. *J Parasitol.* 2003;89(4):749-55, doi:10.1645/ge-2858.
- 541 10. Wilairatana P, Kotepui KU, Mala W, Wangdi K, Kotepui M. Prevalence, probability,  
542 and characteristics of malaria and filariasis co-infections: A systematic review and meta-  
543 analysis. *PLoS Negl Trop Dis.* 2022;16(10):e0010857, doi:10.1371/journal.pntd.0010857.



- 544 11. Lai MC, Kassee C, Besney R, Bonato S, Hull L, Mandy W, et al. Prevalence of co-  
545 occurring mental health diagnoses in the autism population: a systematic review and meta-  
546 analysis. *Lancet Psychiatry*. 2019;6(10):819-29, doi:10.1016/s2215-0366(19)30289-5.
- 547 12. Hoy D, Brooks P, Woolf A, Blyth F, March L, Bain C, et al. Assessing risk of bias in  
548 prevalence studies: modification of an existing tool and evidence of interrater agreement. *J*  
549 *Clin Epidemiol*. 2012;65(9):934-9, doi:10.1016/j.jclinepi.2011.11.014.
- 550 13. Gong QL, Chen Y, Tian T, Wen X, Li D, Song YH, et al. Prevalence of bovine  
551 tuberculosis in dairy cattle in China during 2010-2019: A systematic review and meta-  
552 analysis. *PLoS Negl Trop Dis*. 2021;15(6):e0009502, doi:10.1371/journal.pntd.0009502.
- 553 14. Li R, Li W, Lun Z, Zhang H, Sun Z, Kanu JS, et al. Prevalence of metabolic syndrome in  
554 Mainland China: a meta-analysis of published studies. *BMC Public Health*. 2016;16:296,  
555 doi:10.1186/s12889-016-2870-y.
- 556 15. Faustino R, Faria M, Teixeira M, Palavra F, Sargento P, do Céu Costa M. Systematic  
557 review and meta-analysis of the prevalence of coronavirus: One health approach for a global  
558 strategy. *One Health*. 2022;14:100383, doi:10.1016/j.onehlt.2022.100383.
- 559 16. Velayudhan L, McGoohan K, Bhattacharyya S. Safety and tolerability of natural and  
560 synthetic cannabinoids in adults aged over 50 years: A systematic review and meta-analysis.  
561 *PLoS Med*. 2021;18(3):e1003524, doi:10.1371/journal.pmed.1003524.
- 562 17. Zhu JJ, Lu DL, Zhang WD. Effects of gaps on regeneration of woody plants: a meta-  
563 analysis. *J Forestry Res*. 2014;25(3):501-10, doi:10.1007/s11676-014-0489-3.

- 564 18. Al Maqbali M, Al Sinani M, Al-Lenjawi B. Prevalence of stress, depression, anxiety and  
565 sleep disturbance among nurses during the COVID-19 pandemic: A systematic review and  
566 meta-analysis. *J Psychosom Res.* 2021;141:110343, doi:10.1016/j.jpsychores.2020.110343.
- 567 19. Irwig L, Macaskill P, Berry G, Glasziou P. Bias in meta-analysis detected by a simple,  
568 graphical test. Graphical test is itself biased. *Bmj.* 1998;316(7129):470; author reply -1.
- 569 20. Riquetti NB, Mello CR, Beskow S, Viola MR. Rainfall erosivity in South America:  
570 Current patterns and future perspectives. *Sci Total Environ.* 2020;724:138315,  
571 doi:10.1016/j.scitotenv.2020.138315.
- 572 21. Amoakoh AO, Aplin P, Awuah KT, Delgado-Fernandez I, Moses C, Alonso CP, et al.  
573 Testing the Contribution of Multi-Source Remote Sensing Features for Random Forest  
574 Classification of the Greater Amanzule Tropical Peatland. *Sensors (Basel).* 2021;21(10),  
575 doi:10.3390/s21103399.
- 576 22. Li L, Zhang Y, Zhu J, Zhai X, Cai J, He L, et al. Intracranial Pseudoaneurysm Caused by  
577 Cerebral Paragonimiasis in Pediatric Patients. *Pediatr Neurol.* 2020;109:47-51,  
578 doi:10.1016/j.pediatrneurol.2020.03.018.
- 579 23. Xu HZ, Tang LF, Zheng XP, Chen ZM. Paragonimiasis in chinese children: 58 cases  
580 analysis. *Iran J Pediatr.* 2012;22(4):505-11.
- 581 24. Qian M, Li F, Zhang Y, Qiao Z, Shi Y, Shen J. A retrospective clinical analysis of  
582 pediatric paragonimiasis in a Chinese children's hospital from 2011 to 2019. *Scientific*  
583 *Reports.* 2021;11(1):2005, doi:10.1038/s41598-021-81694-7.

- 584 25. Gong Z, Miao R, Shu M, Zhu Y, Wen Y, Guo Q, et al. Paragonimiasis in Children in  
585 Southwest China: A retrospective case reports review from 2005 to 2016. *Medicine*.  
586 2017;96(25):e7265, doi:10.1097/md.00000000000007265.
- 587 26. Devi KR, Narain K, Bhattacharya S, Negmu K, Agatsuma T, Blair D, et al.  
588 Pleuropulmonary paragonimiasis due to *Paragonimus heterotremus*: molecular diagnosis,  
589 prevalence of infection and clinicoradiological features in an endemic area of northeastern  
590 India. *Trans R Soc Trop Med Hyg*. 2007;101(8):786-92, doi:10.1016/j.trstmh.2007.02.028.
- 591 27. Rabone M, Wiethase J, Clark PF, Rollinson D, Cumberlidge N, Emery AM. Endemicity  
592 of *Paragonimus* and paragonimiasis in Sub-Saharan Africa: A systematic review and  
593 mapping reveals stability of transmission in endemic foci for a multi-host parasite system.  
594 *PLoS Negl Trop Dis*. 2021;15(2):e0009120, doi:10.1371/journal.pntd.0009120.
- 595 28. Shih HT, Huang C, Ng PK. A re-appraisal of the widely-distributed freshwater crab  
596 genus *Sinopotamon* Bott, 1967, from China, with establishment of a new genus (Crustacea:  
597 Decapoda: Potamidae). *Zootaxa*. 2016;4138(2):309-31, doi:10.11646/zootaxa.4138.2.5.
- 598 29. Huang C, Shih HT, Mao SY. *Yuebeipotamon calciatile*, a new genus and new species of  
599 freshwater crab from southern China (Crustacea, Decapoda, Brachyura, Potamidae). *Zookeys*.  
600 2016(615):61-72, doi:10.3897/zookeys.615.9964.
- 601 30. Bao J, Xing Y, Feng C, Kou S, Jiang H, Li X. Acute and sub-chronic effects of copper  
602 on survival, respiratory metabolism, and metal accumulation in *Cambaroides dauricus*.  
603 *Scientific Reports*. 2020;10(1):16700, doi:10.1038/s41598-020-73940-1.
- 604 31. Chen JQ, Liu SH, Luo J, Cai MR, Cheng YZ. Investigation on freshwater crab  
605 populations and *Paragonimus* infections in the Minjiang River basin along the middle section

606 of Wuyi Mountain. Chin J Schisto Control. 2021;33(6):590-9,  
607 doi:10.16250/j.32.1374.2021154 (in Chinese).

608 32. Cheng YZ, Li LS, Lin GH, Zhou PC, Jiang DW, Fang YY, et al. Survey on the foci of  
609 *Paragonimus* in Youxi, Yongtai and Pinghe Counties of Fujian Province. Chin J Parasitol  
610 Parasit Dis. 2010;28(6):406-10 (in Chinese).

611 33. Li BW, McNulty SN, Rosa BA, Tyagi R, Zeng QR, Gu KZ, et al. Conservation and  
612 diversification of the transcriptomes of adult *Paragonimus westermani* and *P. skrjabini*.  
613 Parasit Vectors. 2016;9(1):497, doi:10.1186/s13071-016-1785-x.

614 34. Tidman R, Kanankege KST, Bangert M, Abela-Ridder B. Global prevalence of 4  
615 neglected foodborne trematodes targeted for control by WHO: A scoping review to highlight  
616 the gaps. PLoS Negl Trop Dis. 2023;17(3):e0011073, doi:10.1371/journal.pntd.0011073.

617 35. Sasaki J, Matsuoka M, Kinoshita T, Horii T, Tsuneyoshi S, Murata D, et al. A Cluster of  
618 Paragonimiasis with Delayed Diagnosis Due to Difficulty Distinguishing Symptoms from  
619 Post-COVID-19 Respiratory Symptoms: A Report of Five Cases. Medicina (Kaunas).  
620 2023;59(1), doi:10.3390/medicina59010137.

621 36. Sharma OP. The man who loved drunken crabs. A case of pulmonary paragonimiasis.  
622 Chest. 1989;95(3):670-2, doi:10.1378/chest.95.3.670.

623 37. Chen WQ, Deng Y, Zhang YL, Ai L, Chen JX, Lin XM, et al. A case of group infections  
624 with *Paraginimus* species in Henan, Central China. Acta Trop. 2020;202:105111,  
625 doi:10.1016/j.actatropica.2019.105111.

- 626 38. Peng X, Zhang J, Zhang J, Wang Y, Zhang X. Incidence of paragonimiasis in Chongqing  
627 China: a 6-year retrospective case review. *Parasitology*. 2018;145(6):792-6,  
628 doi:10.1017/s003118201700172x.
- 629 39. Hu W. Studies on the life cycle of *Paragonimus heterotremus*. *Chin J Parasitol Parasit*  
630 *Dis*. 1998;16(5):347-52 (in Chinese).
- 631 40. Chiu JK. Tríenla chiui Habe et Miyazaki, 1962: a snail host for *Paragonimus*  
632 *iloktsuenensis* Chen, 1940 in Taiwan. *Jap J Para-sitol*. 1965;14(3):269-80.
- 633 41. Fan PC, Lu H, Lin LH. Experimental infection of *Paragonimus westermani* in mice and  
634 rats. *Korean J Parasitol*. 1993;31(2):91-7, doi:10.3347/kjp.1993.31.2.91.
- 635 42. Yin Y, He Q, Pan X, Liu Q, Wu Y, Li X. Predicting Current Potential Distribution and  
636 the Range Dynamics of *Pomacea canaliculata* in China under Global Climate Change.  
637 *Biology (Basel)*. 2022;11(1), doi:10.3390/biology11010110.
- 638 43. Chen Y, Zhu M. Spatiotemporal Evolution and Driving Mechanism of "Production-  
639 Living-Ecology" Functions in China: A Case of Both Sides of Hu Line. *Int J Environ Res*  
640 *Public Health*. 2022;19(6), doi:10.3390/ijerph19063488.

641

## 642 **Supporting information**

643 **S1Table. Publications reporting *Paragonimus* infection in humans.**

644 **S2Table. Publications reporting *Paragonimus* infection in the first intermediate**  
645 **hosts.**

646 **S3Table. Publications reporting *Paragonimus* infection in the second**  
647 **intermediate hosts.**

648 **S4Table. Publications reporting *Paragonimus* infection in animal reservoirs.**

649 **S5Table. Multivariable meta-regression analyses for *Paragonimus* infection in**  
650 **humans.**

651 **S6Table. Multivariable meta-regression analyses for *Paragonimus* infection in the**  
652 **first intermediate hosts.**

653 **S7Table. Multivariable meta-regression analyses for *Paragonimus* infection in the**  
654 **second intermediate hosts.**

655 **S8Table. Multivariable meta-regression analyses for *Paragonimus* infection in**  
656 **animal reservoirs.**

657 **S9Table. Sensitivity analysis of the pooled prevalence of *Paragonimus* in humans,**  
658 **the first intermediate hosts, the second intermediate hosts, and animal reservoirs.**

659 **S10Table. Environmental characteristics of areas with reported *P. westermani***  
660 **and *P. skrjabini* infections in China.**

661 **S1Fig. Forest plots of prevalence of *Paragonimus* species in humans, the first**  
662 **intermediate host, the second intermediate host, and animal reservoirs. (a)**  
663 ***Paragonimus* in humans; (b) *P. westermani* in the first intermediate host; (c) *P.***  
664 ***skrjabini* in the first intermediate host; (d) *P. westermani* in the second**  
665 **intermediate host; (e) *P. skrjabini* in the second intermediate host; (f) *P. skrjabini***  
666 **in animal reservoir; (g) *P. westermani* in animal reservoir.**

667 **S2Fig. Funnel plot for assessing publication bias in studies reporting prevalence**  
668 **of *Paragonimu***  
669 **s species in humans, the first intermediate host, the second intermediate host,**  
670 **and animal reservoirs (a) *Paragonimus* in humans; (b) *P. skrjabini* in the first**  
671 **intermediate host; (c) *P. westermani* in the first intermediate host; (d) *P. skrjabini***

672 in the second intermediate host; (e) *P. westermani* in the second intermediate host;  
673 (f) *P. skrjabini* in animal reservoir; (g) *P. westermani* in animal reservoir.

674

## 675 **Figures and Tables**

676 **Fig 1. Flow diagram of study selection for the systematic review and meta analysis.**

677 **Fig 2. Spatial distribution of human paragonimiasis cases documented in China.**

678 **Fig 3. Spatial distribution of *P. westermani* and *P. skrjabini* infection in the first**  
679 **intermediate hosts in China. (a) *P. westermani* infection in the first intermediate hosts; (b)**  
680 ***P. skrjabini* infection in the first intermediate hosts;**

681 **Fig 4. Spatial distribution of *P. westermani* and *P. skrjabini* infection in the second**  
682 **intermediate hosts in China. (a) *P. westermani* infection in the second intermediate hosts;**  
683 **(b) *P. skrjabini* infection in the second intermediate hosts.**

684 **Fig 5. Environmental characteristics of areas with reported *Paragonimus* infections in**  
685 **China.**

686 **Table 1. Characteristics of human paragonimiasis cases documented in China.**

687 **Table 2. Estimates of pooled prevalence and subgroup analysis of *Paragonimus* in**  
688 **humans.**

689 **Table 3. Estimates of pooled prevalence and subgroup analysis of *Paragonimus* in the**  
690 **first intermediate host.**

691 **Table 4. Estimates of pooled prevalence and subgroup analysis of *Paragonimus* in the**  
692 **second intermediate host.**

693 **Table 5. Estimates of pooled prevalence and subgroup analysis of *Paragonimus* in**  
694 **animal reservoirs.**

695

## 696 **Data reporting**

697 The data that supports the findings of this study are available in the supplementary  
698 material of this article.



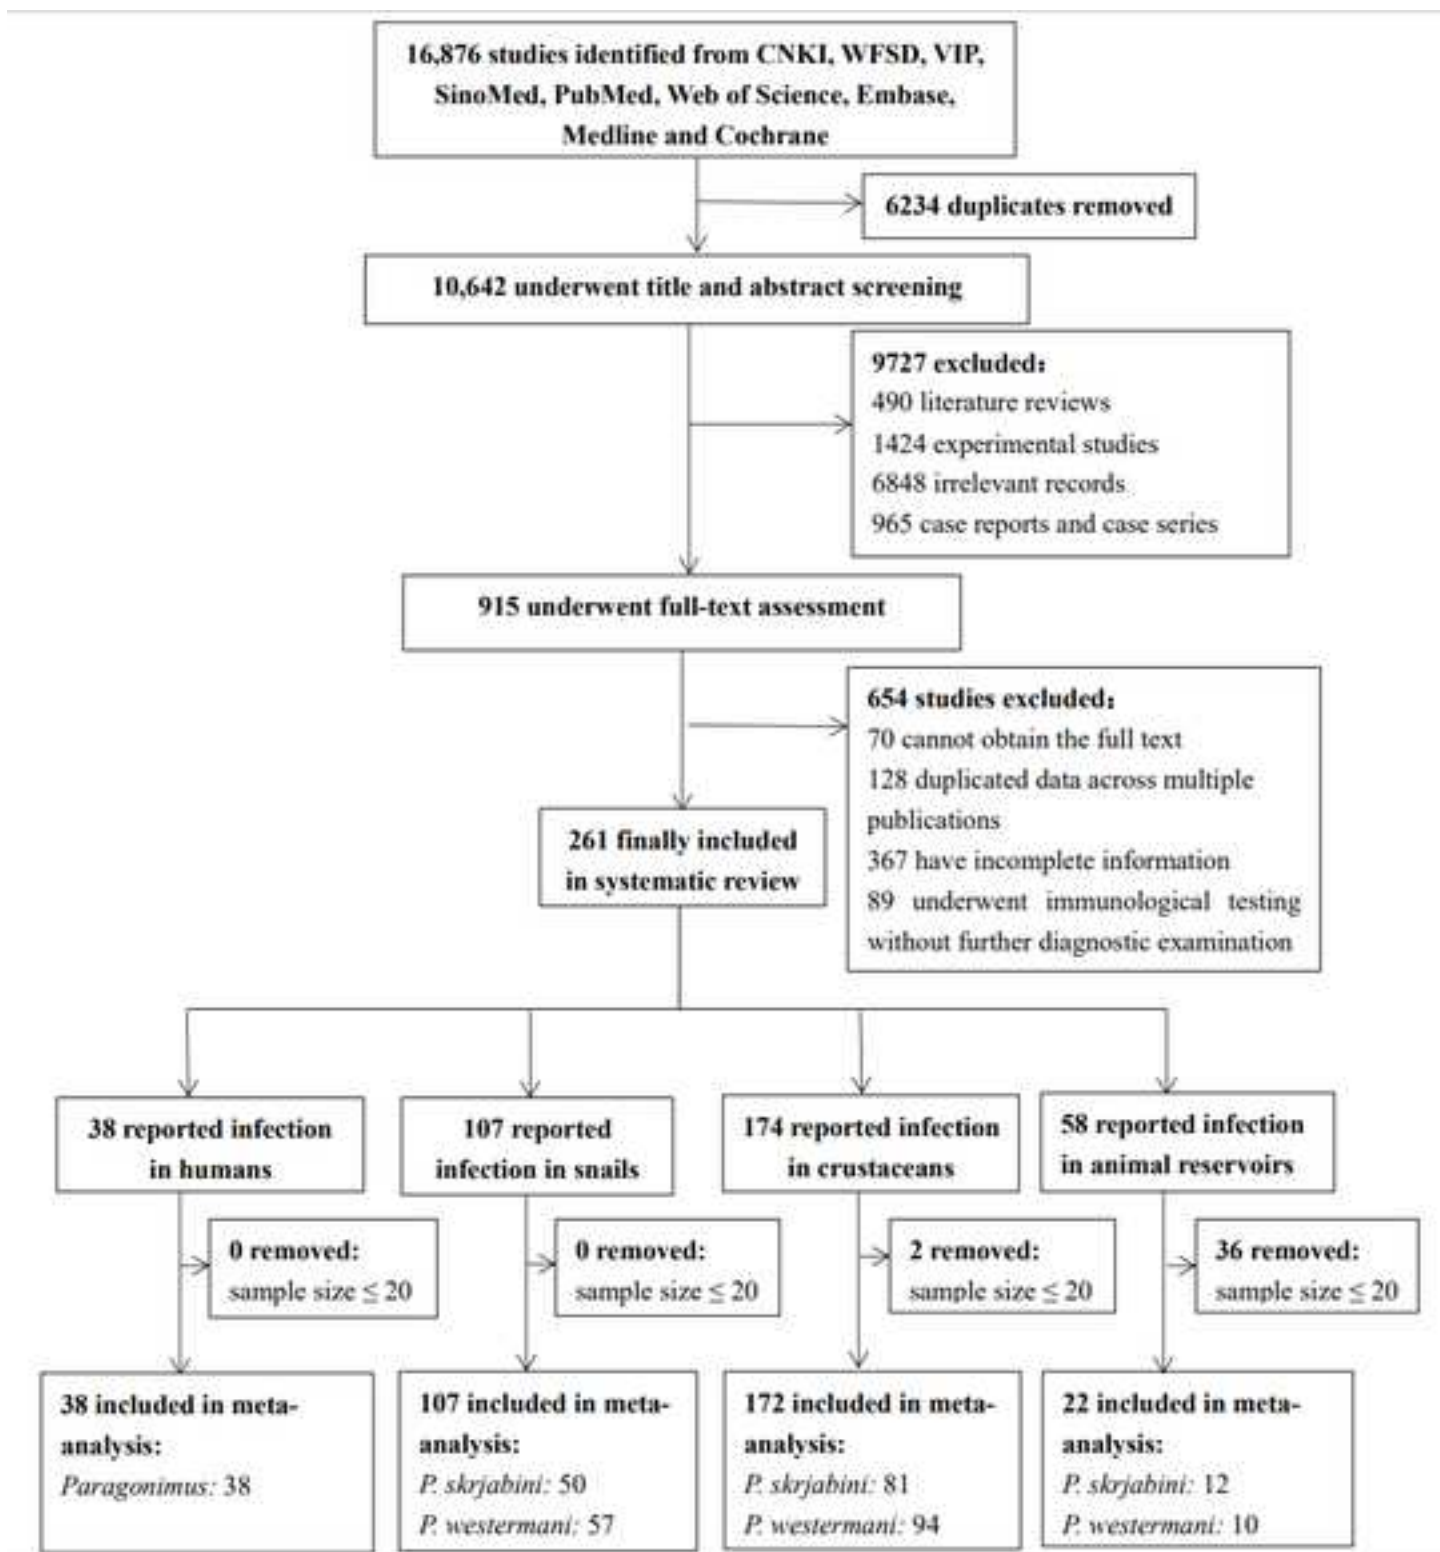

Fig 2. Spatial distribution of human paragonimiasis cases documented in China.

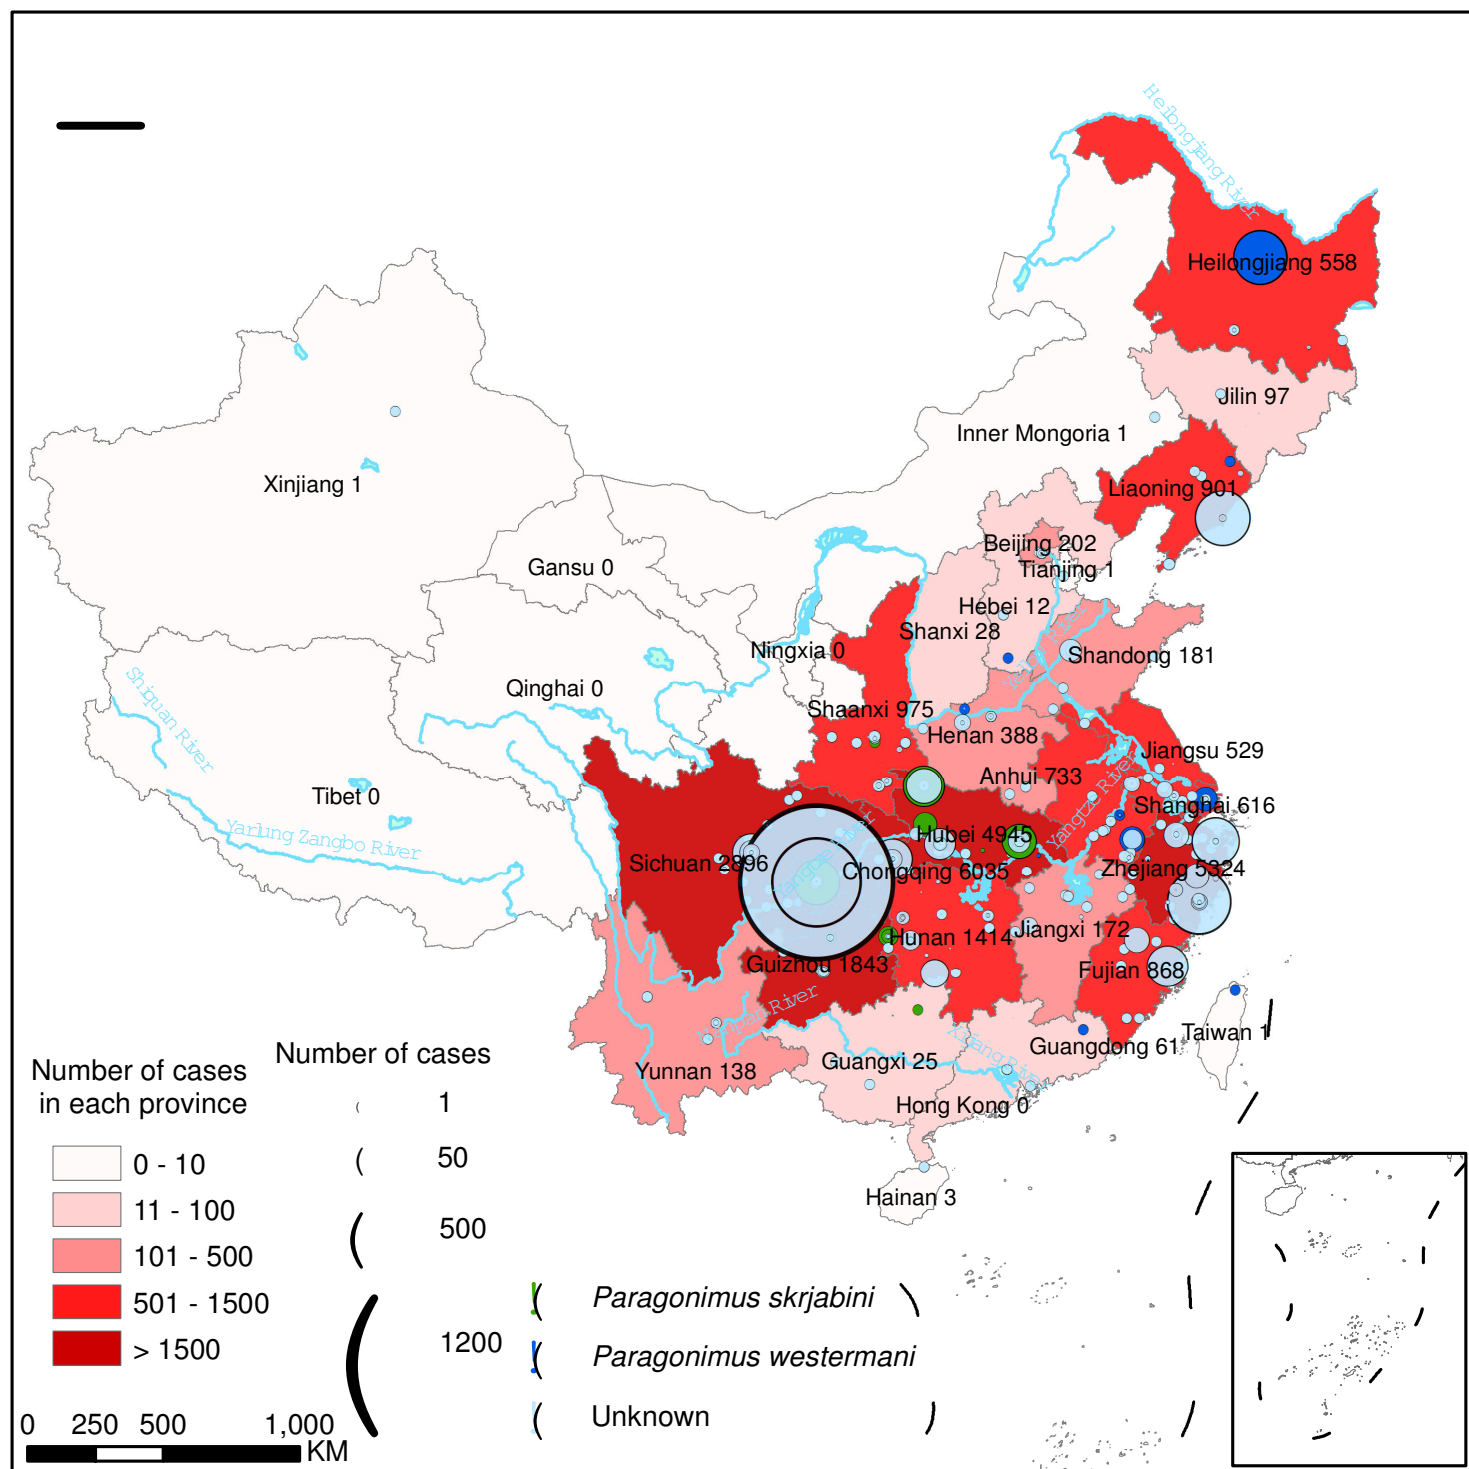

Fig 3a. Spatial distribution of *P. westermani* infection in the first intermediate hosts.

[Click here to access/download;Figure;Fig 3a.eps](#)

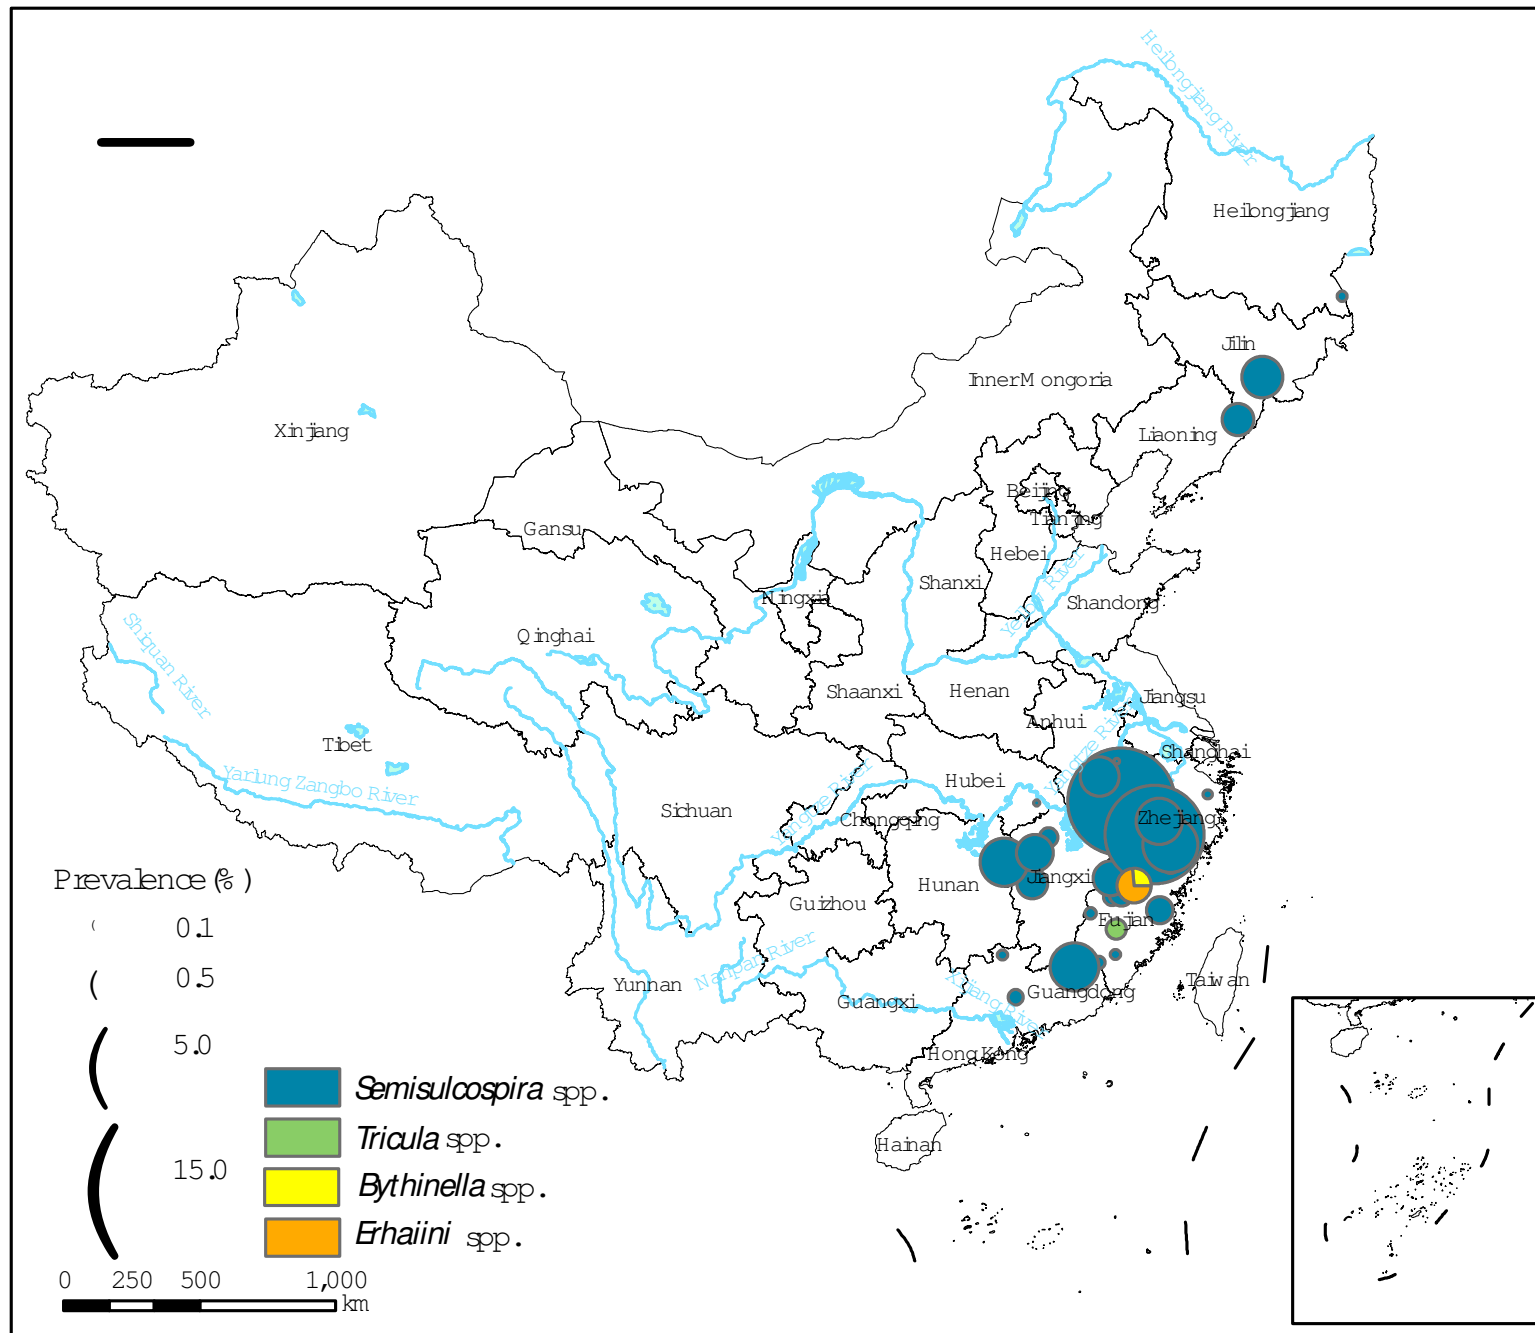

Fig 3b. Spatial distribution of *P. skrjabini* infection in the first intermediate hosts.

[Click here to access/download;Figure;Fig 3b.eps](#)

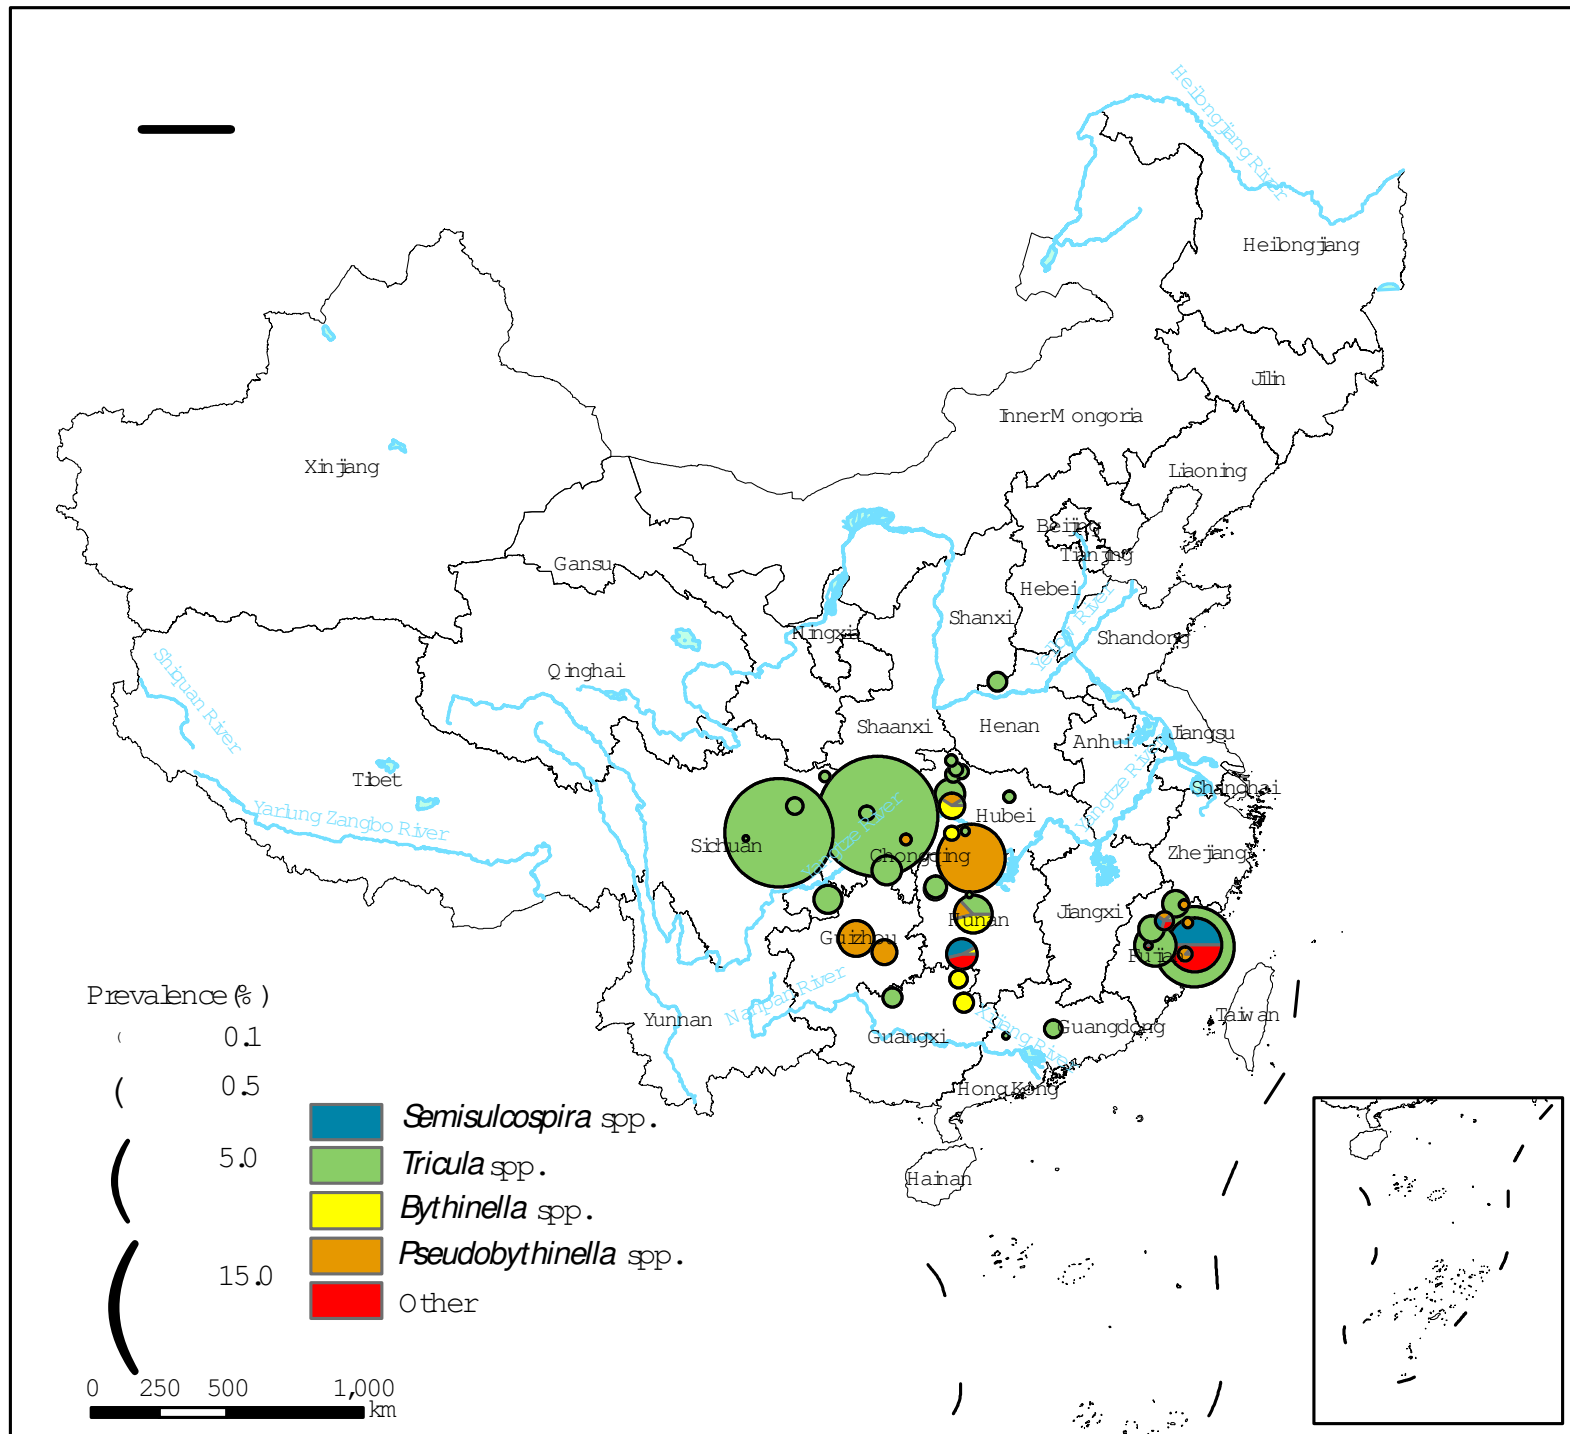

Fig 4a. Spatial distribution of *P. westermani* infection in the second intermediate hosts.

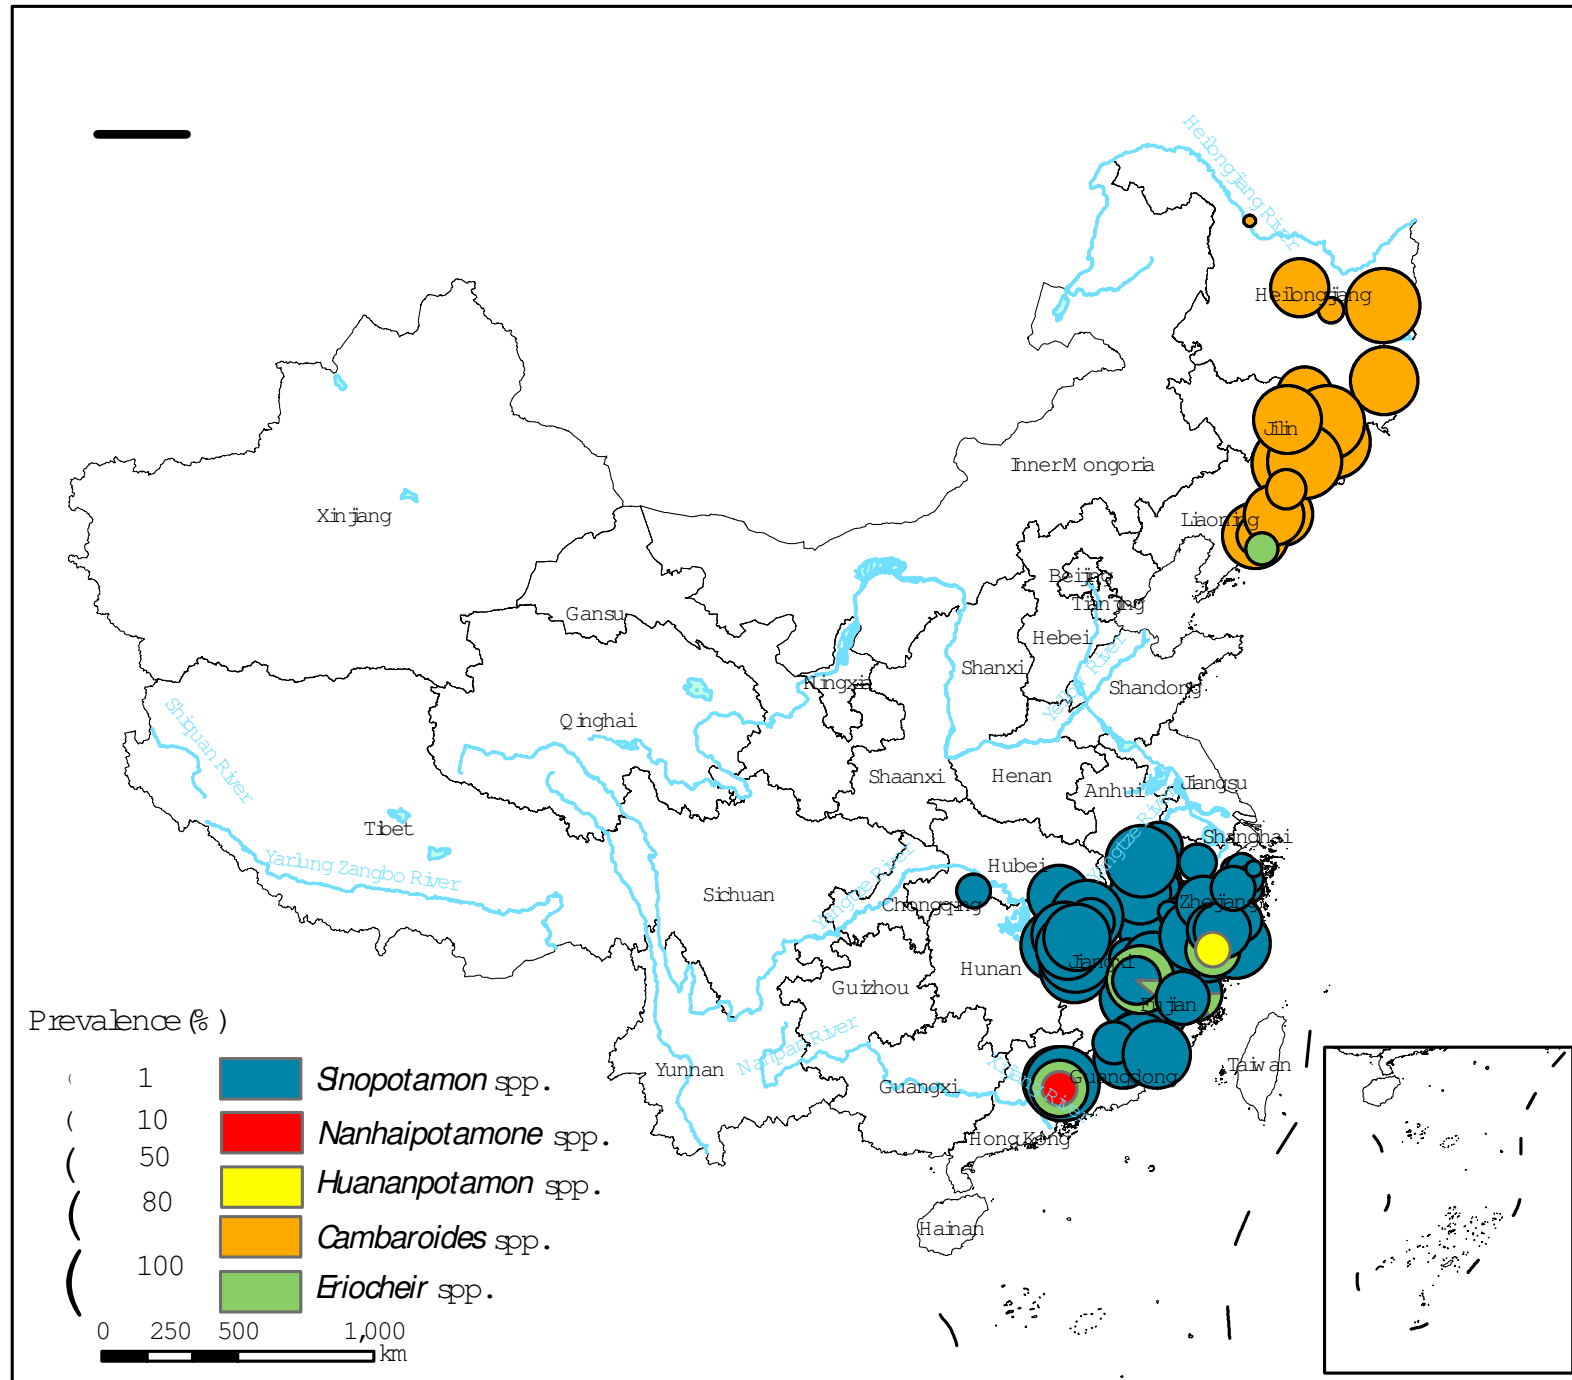

Fig 4b. Spatial distribution of *P. skrjabini* infection in the second intermediate hosts.

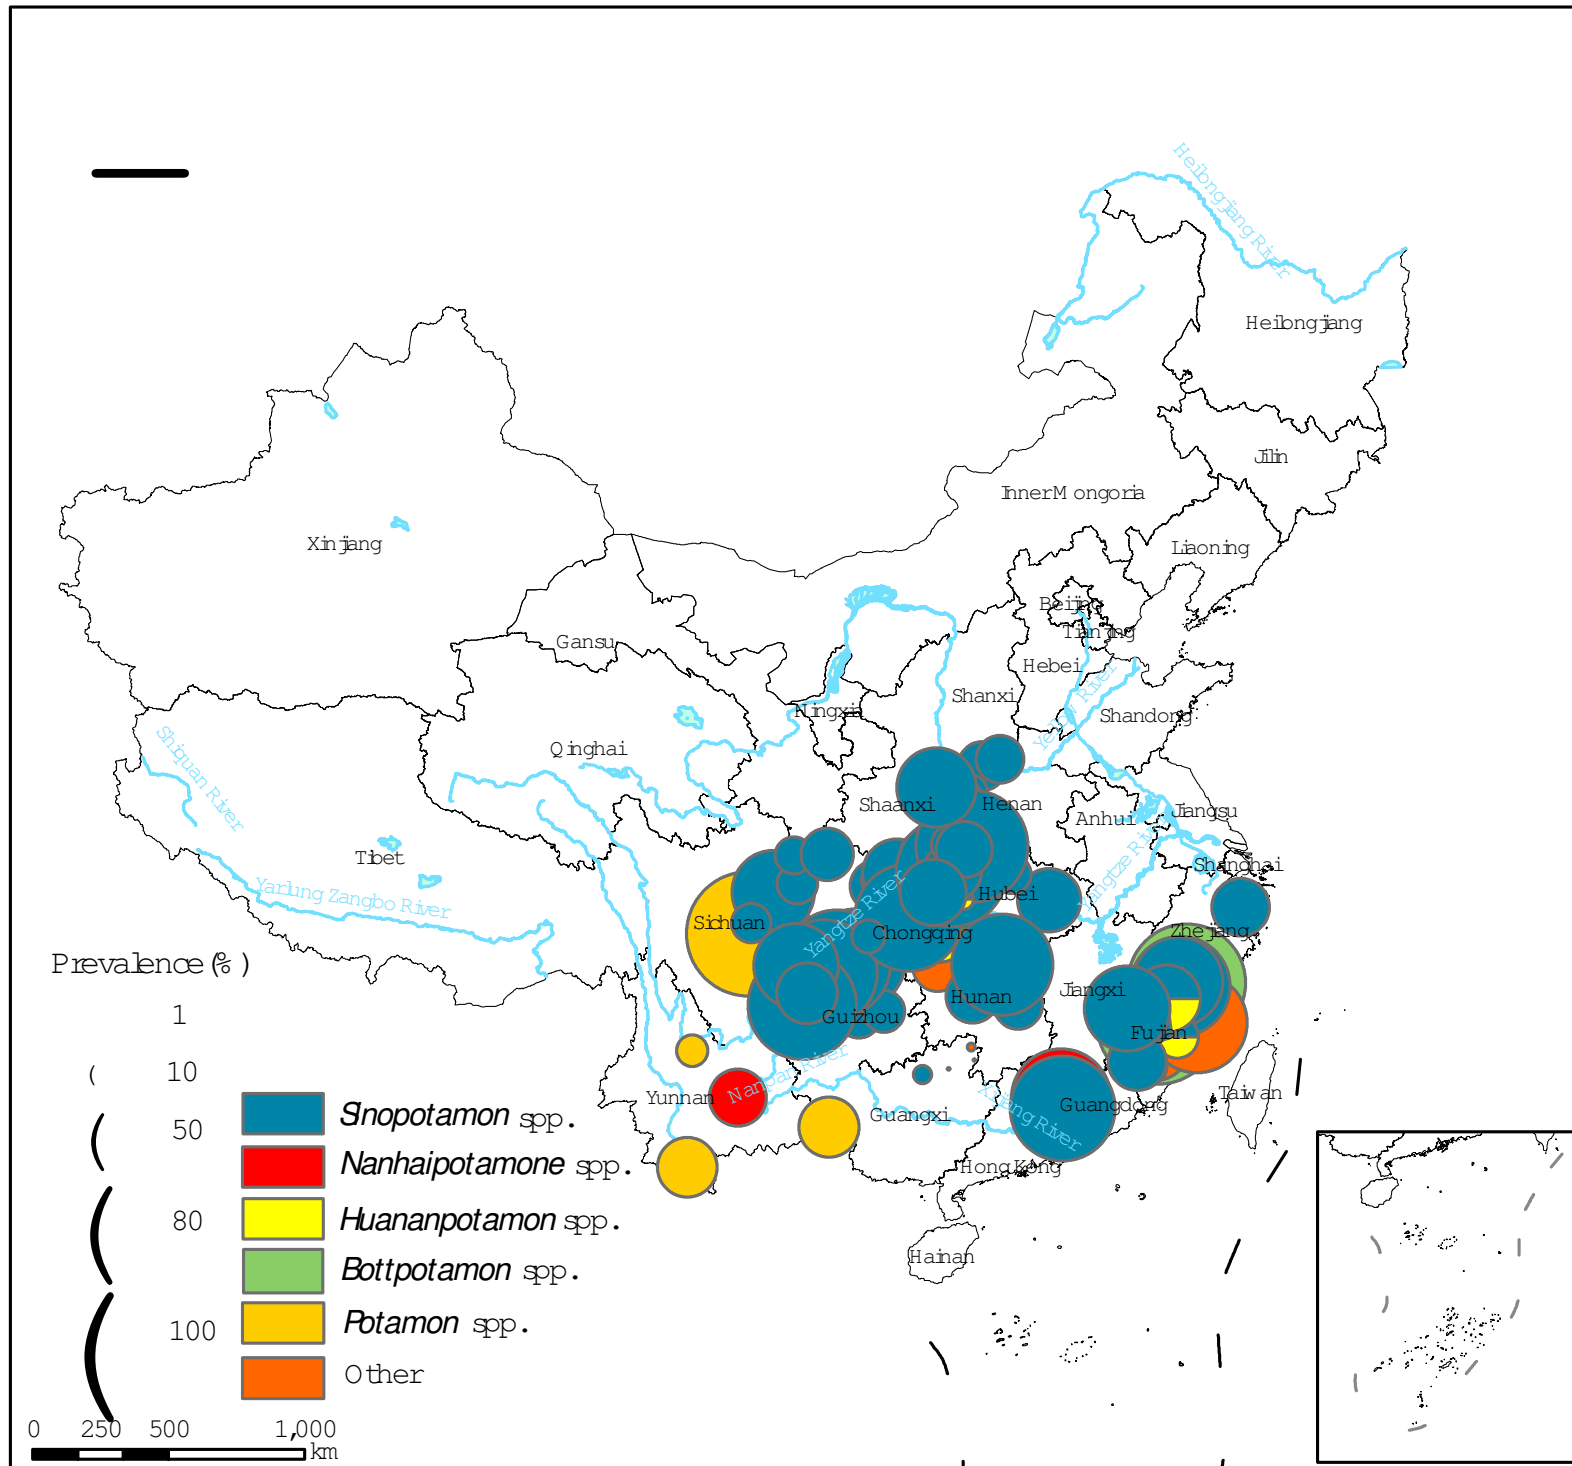

Fig 5. Environmental characteristics of areas with reported Paragonimus infections in China.

[Click here to access/download;Figure;Fig 5.tif](#)

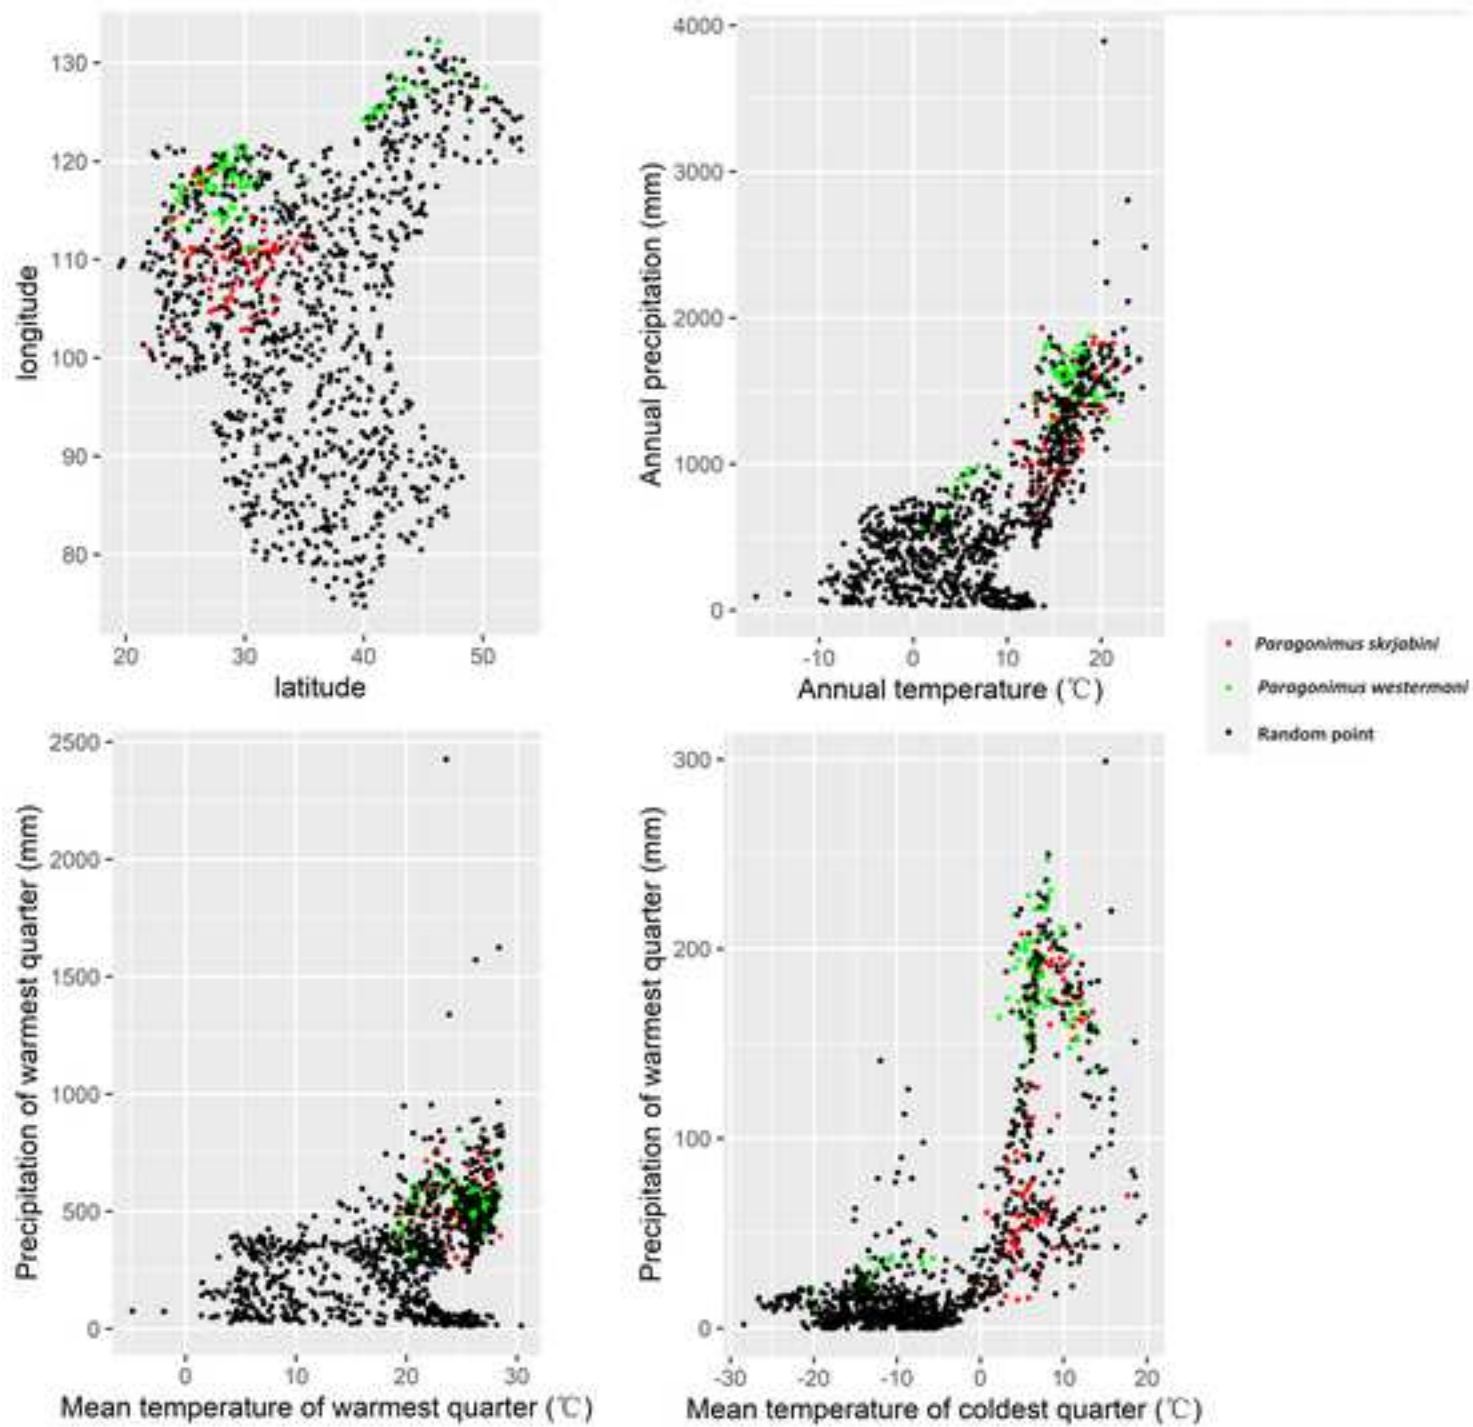

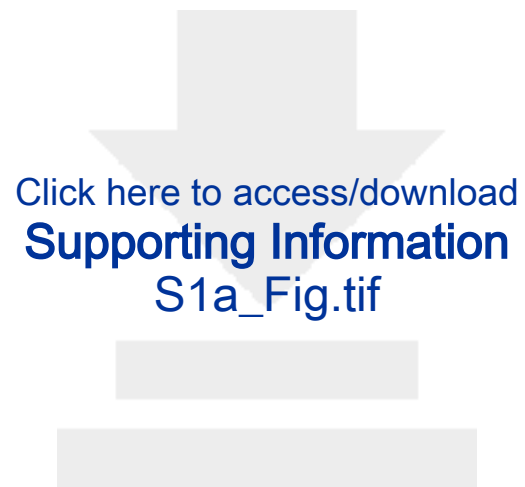



S1b Fig. Forest plots of prevalence of *P. westermani* in the first intermediate host.

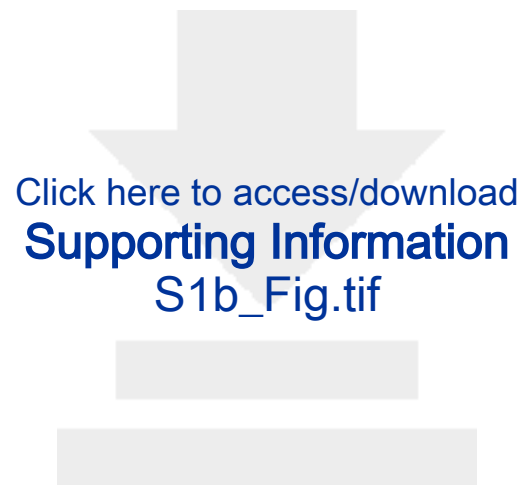

S1c Fig. Forest plots of prevalence of *P. skrjabini* in the first intermediate host.

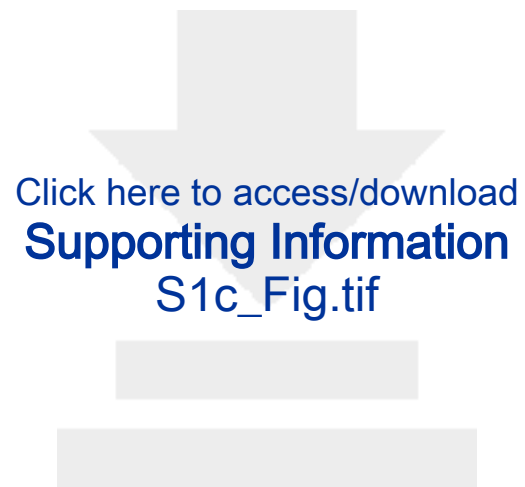

S1d Fig. Forest plots of prevalence of *P. westermani* in the second intermediate host.

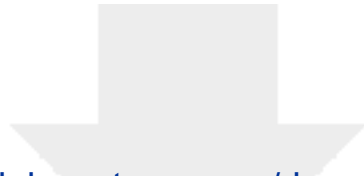

Click here to access/download  
**Supporting Information**  
S1d\_Fig.tif

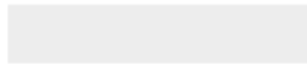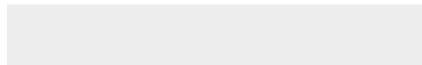

S1e Fig. Forest plots of prevalence of *P. skrjabini* in the second intermediate host.

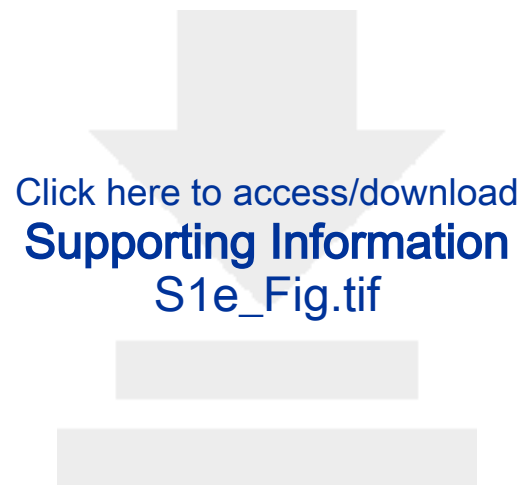

Click here to access/download  
**Supporting Information**  
S1e\_Fig.tif

S1f Fig. Forest plots of prevalence of *P. skrjabini* in animal reservoir.

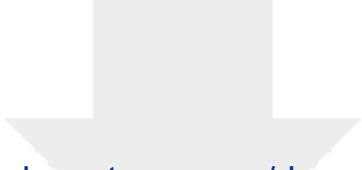

Click here to access/download  
**Supporting Information**  
S1f\_Fig.tif



S1g Fig. Forest plots of prevalence of *P. westermani* in animal reservoir.

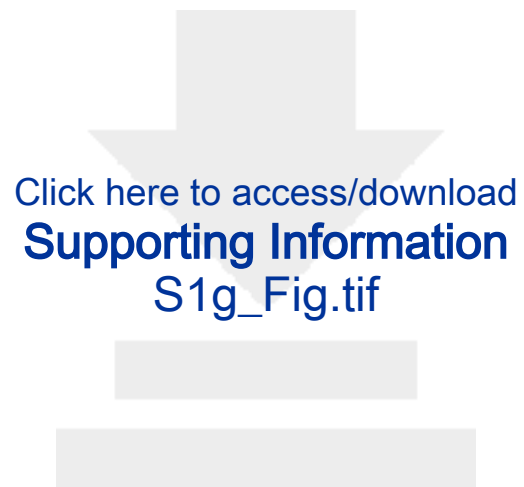

S2a Fig. Funnel plot for assessing publication bias in studies reporting prevalence of Paragonimus in humans.

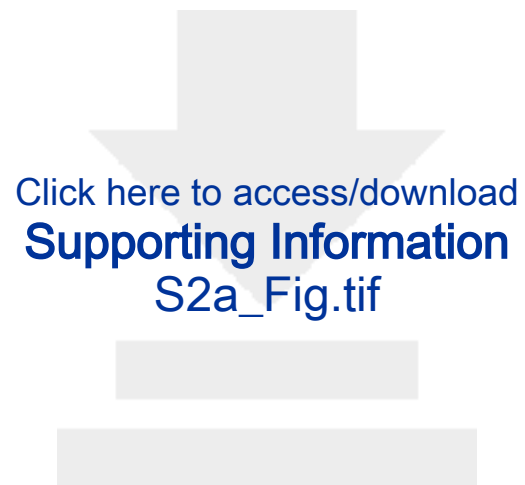

S2b Fig. Funnel plot for assessing publication bias in studies reporting prevalence of *P. skrjabini* in the first intermediate host.

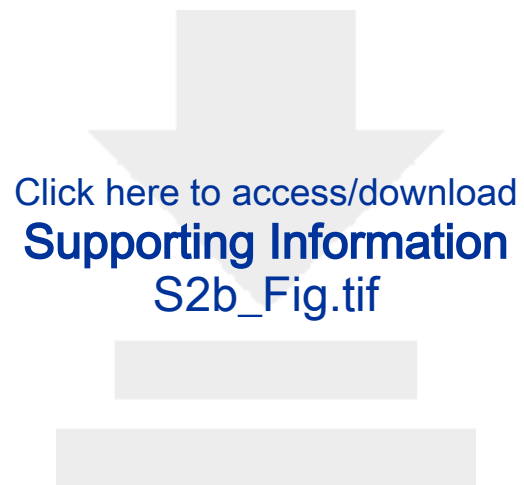



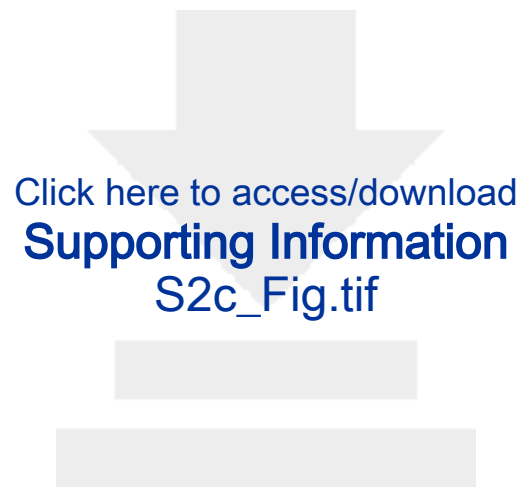



Click here to access/download  
**Supporting Information**  
S2d\_Fig.tif

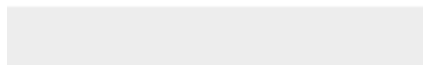

S2e Fig. Funnel plot for assessing publication bias in studies reporting prevalence of *P. westermani* in the second intermediate

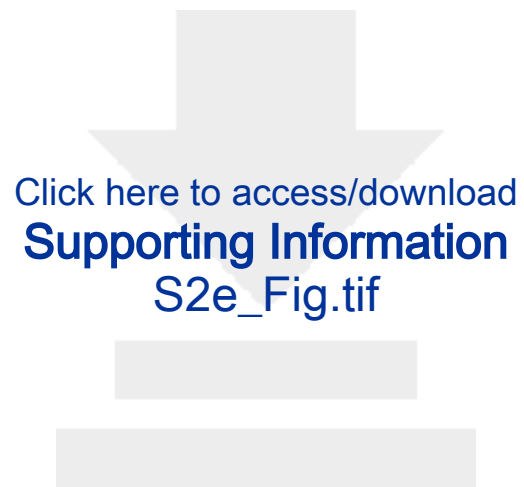

S2f Fig. Funnel plot for assessing publication bias in studies reporting prevalence of *P. skrjabini* in animal reservoir.

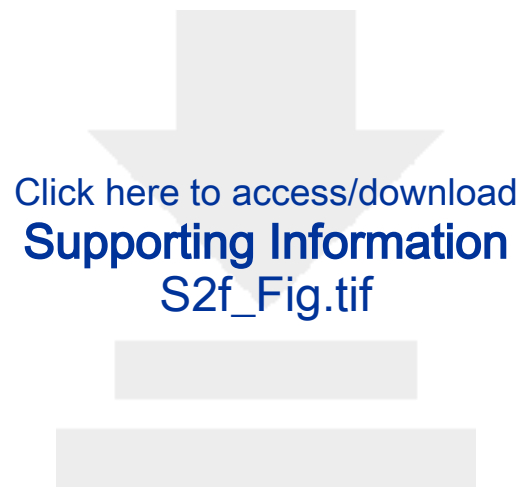

S2g Fig. Funnel plot for assessing publication bias in studies reporting prevalence of *P. westermani* in animal reservoir.

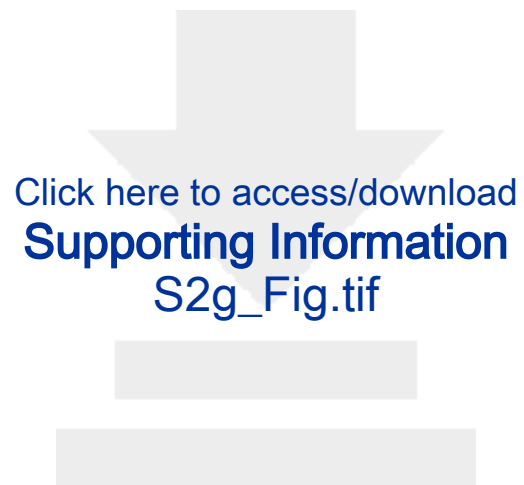

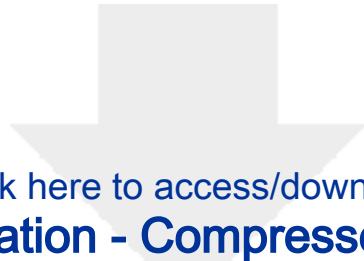

[Click here to access/download](#)

**Supporting Information - Compressed/ZIP File Archive**  
**S1-S10 Tables.zip**

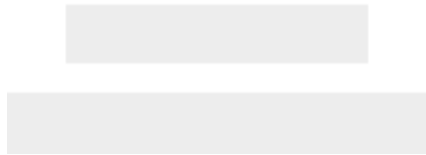

Supplement: pntd.0012366.s014.pdf [file pntd.0012366.s014.pdf]
